# 1 **Asymmetric cell volume changes regulate epithelial morphogenesis in zebrafish Kupffer's** 2 **vesicle**

3

4 Agnik Dasgupta<sup>1</sup>, Matthias Merkel<sup>2</sup>, Andrew E. Jacob<sup>1</sup>, Jonathan Dawson<sup>2</sup>, M. Lisa Manning<sup>2\*</sup> and  
5 Jeffrey D. Amack<sup>1\*</sup>

6

7 <sup>1</sup>Department of Cell and Developmental Biology, State University of New York, Upstate Medical  
8 University, Syracuse, NY, 13210, USA

9 <sup>2</sup>Department of Physics, Syracuse University, Syracuse, NY, 13224, USA

10 \*Authors for correspondence.

11

## 12 **ABSTRACT**

13 How epithelial cell behaviors are coordinately regulated to sculpt tissue architecture is a  
14 fundamental question in biology. Kupffer's vesicle (KV), a transient organ with a fluid-filled  
15 lumen, provides a simple system to investigate the interplay between intrinsic cellular  
16 mechanisms and external forces during epithelial morphogenesis. Using 3-dimensional (3D)  
17 analyses of single cells we identify asymmetric cell volume changes along the anteroposterior  
18 axis of KV that coincide with asymmetric cell shape changes. Blocking ion flux prevents these  
19 cell volume changes and cell shape changes. Vertex simulations suggest cell shape changes  
20 do not depend on lumen expansion. Consistent with this prediction, asymmetric changes in KV  
21 cell volume and shape occur normally when KV lumen growth fails due to leaky cell adhesions.  
22 These results indicate ion flux mediates asymmetric cell volume changes that contribute to  
23 asymmetric cell shape changes in KV, and that these changes in epithelial morphology are  
24 separable from lumen-generated forces.

25

## 26 **INTRODUCTION**

27 In an embryo, epithelial cells undergo tightly regulated shape changes to drive tissue  
28 remodeling and organ development. Changes in epithelial cell morphology can be mediated by  
29 intrinsic mechanisms, such as rearrangements of the actomyosin cytoskeleton that often occur  
30 in response to biochemical signaling cascades (Fuss et al., 2004, Escudero et al., 2007).  
31 Extrinsic biophysical forces can also influence epithelial morphogenesis (Navis and Nelson,  
32 2016, Navis and Bagnat, 2015). For example, the mechanical properties of neighboring cells  
33 can help shape how an epithelium develops (Luu et al., 2011, Sedzinski et al., 2016). Another  
34 source of extrinsic force found in many organs is a fluid-filled lumen. Forces generated by  
35 increased fluid pressure during lumen expansion can have an impact on individual cell shapes  
36 and the overarching epithelial architecture (Bagnat et al., 2010). Conversely, movements of

37 fluids from epithelial cells to the lumen have been proposed to regulate both lumen growth and  
38 thinning of the epithelium (Hoijsman et al., 2015). Thus, exactly how intrinsic molecular  
39 mechanisms and extrinsic mechanical forces interact to regulate epithelial cell shape changes  
40 during organogenesis remains an open and intriguing question.

41

42 In this study, we used the zebrafish Kupffer's vesicle (KV) as a model organ to  
43 investigate mechanisms that regulate shape changes of single cells during epithelial  
44 morphogenesis. KV, which functions as a 'left-right organizer' to determine left-right asymmetry  
45 of the zebrafish embryo (Essner et al., 2005, Kramer-Zucker et al., 2005), is a transient organ  
46 comprised of a single layer of ~50 epithelial cells that surround a fluid-filled lumen. Each KV cell  
47 extends a motile monocilium into the lumen to generate asymmetric fluid flows that direct left-  
48 right patterning signals. Fate mapping studies have identified precursor cells, called dorsal  
49 forerunner cells (DFCs), that differentiate into epithelial KV cells at the end of gastrulation  
50 stages of development (Melby et al., 1996, Cooper and D'Amico, 1996). These cells then form  
51 the KV organ in the tailbud at the embryonic midline (marked by notochord) during early  
52 somitogenesis stages (**Figure 1A**). Similar to other organs that develop a fluid-filled lumen—  
53 such as the gut tube (Alvers et al., 2014) or pancreas (Villasenor et al., 2010)—KV cells form a  
54 rosette-like structure to give rise to a nascent lumen that expands over time (Amack et al., 2007,  
55 Oteiza et al., 2008). Previous 2-dimensional (2D) analyses of KV cells revealed that during  
56 expansion of the KV lumen, KV cells at the middle focal plane undergo asymmetric cell shape  
57 changes along the anteroposterior (AP) axis that sculpt the architecture of the mature KV organ  
58 (Wang et al., 2012). A transgenic strain developed in this study, *Tg(sox17:GFP-CAAX)*,  
59 provides bright labeling of KV cell membranes with green fluorescent protein (GFP) that shows  
60 the AP asymmetric architecture of the whole organ (**Movie 1**) and the 2D shapes of epithelial  
61 KV cells (**Figure 1A**). KV cells have similar shapes at early stages of development, whereas at  
62 later stages the cells in the anterior half of KV (KV-ant cells) develop columnar morphologies  
63 that allow tight packing of these cells and posterior KV cells (KV-post cells) become wide and  
64 thin (Wang et al., 2012) (**Figure 1B**). This morphogenetic process, which we refer to as 'KV  
65 remodeling', results in an AP asymmetric distribution of cilia that is necessary to drive fluid flows  
66 for left-right patterning (Wang et al., 2012). Thus, KV is a simple and accessible organ that is  
67 ideal for probing the relationship between intrinsic and extrinsic mechanisms that drive epithelial  
68 morphogenesis.

69

70 Previous studies of KV have successfully contributed to our understanding of how  
71 epithelial cell shapes are regulated during embryogenesis, but the mechanisms that control KV  
72 cell shape changes are not fully understood. Experimental results and mathematical simulations  
73 from our group indicate that actomyosin contractility and differential interfacial tensions between  
74 KV cells mediate asymmetric cell shape changes (Wang et al., 2012). Additional studies  
75 identified an AP asymmetric deposition of extracellular matrix (ECM) implicated in restricting  
76 anterior KV cell shape during KV lumen expansion (Compagnon et al., 2014). We reasoned that  
77 these mechanisms likely work in concert with yet additional mechanisms to fully instruct  
78 epithelial morphogenesis during KV organ formation. Here, we developed methods to analyze  
79 single KV cells in 3-dimensions (3D) and created novel mathematical vertex models of KV  
80 development to identify mechanisms that contribute to asymmetric epithelial cell shape changes  
81 in KV. 3D analyses revealed that KV-ant cells increase their volume and KV-post cells decrease  
82 their volume during KV morphogenesis. These asymmetric cell volume changes occur at the  
83 same time as asymmetric cell shape changes. At the molecular level, KV cell volume and shape  
84 changes are mediated by ion channel activity that regulates ion flux and fluid transport. We next  
85 tested whether extrinsic biophysical forces had an impact on these cell morphology changes.  
86 Mathematical models indicate that mechanical properties of external cells surrounding the KV  
87 can impact cell shape changes in the KV. Models predicted that when external tissues are solid-  
88 like, asymmetric cell volume changes in KV cells contribute to cell shape changes even in the  
89 absence of lumen expansion. Consistent with mathematical model predictions, experimental  
90 perturbations of lumen expansion indicated that changes in KV cell volume and shape can occur  
91 independent of forces associated with lumen growth. Together, our results suggest ion channel  
92 mediated fluid flux serves as an intrinsic mechanism to regulate epithelial cell morphodynamics  
93 that create asymmetry in the KV organ. These findings shed new light on the interplay between  
94 lumenogenesis and epithelial morphogenesis and provide an example of cell morphology  
95 changes that can be uncoupled from mechanical forces exerted during lumen expansion.

96

## 97 **RESULTS**

98

### 99 **Mosaic labeling enables 3D analysis of single KV cells**

100 To investigate 3D behaviors of KV cells we first generated stable *Tg(sox17:GFP-CAAX)*  
101 transgenic zebrafish using a *sox17* promoter (Sakaguchi et al., 2006) to express membrane  
102 localized GFP (GFP-CAAX) in KV cells. This transgene marks all cells in the KV and is useful

103 for delineating 2D cell morphology (**Figure 1A**). However, due to difficulties in determining exact  
104 cell-cell boundaries in the KV (**Movie 1**), this strain is not ideal for visualizing individual KV cells  
105 in 3D. Therefore, we next developed a Cre-*loxP* based mosaic cell labeling method to visualize  
106 single KV cells. For this approach, we generated transgenic *Tg(sox17:Cre<sup>ERT2</sup>)* zebrafish that  
107 expresses Cre recombinase in the KV cell lineage that has inducible activity through the addition  
108 of 4-hydroxytamoxifen (4-OHT) (Feil et al., 1997). Transgenic *Tg(sox17:Cre<sup>ERT2</sup>)* fish were  
109 crossed with a previously described *Tg(ubi:Zebrawow)* ('zebrabow') strain (Pan et al., 2013) that  
110 can be used to generate differential fluorescent labeling of cells based on stochastic Cre-  
111 mediated recombination of the zebrabow transgene (**Figure 1C**). Double transgenic  
112 *Tg(sox17:Cre<sup>ERT2</sup>); Tg(ubi:Zebrawow)* embryos were briefly treated with 4-OHT from the dome  
113 stage (4 hours post-fertilization or hpf) to the shield stage (6 hpf) (**Figure 1D**) to induce low  
114 levels of Cre activity that resulted in a switch from the default RFP (red fluorescent protein)  
115 expression to YFP (yellow fluorescent protein) expression in a subset of KV cells (**Figure 1E**).  
116 This strategy reliably created mosaic labeled KVs containing a few YFP<sup>+</sup> KV cells with  
117 boundaries that are easily distinguished from surrounding RFP<sup>+</sup> cells (**Movie 2**). Images of  
118 mosaic labeled KVs in living *Tg(sox17:Cre<sup>ERT2</sup>); Tg(ubi:Zebrawow)* embryos were volume-  
119 rendered using Imaris (Bitplane) software to generate 3D reconstructions of the lumen and KV  
120 cells (**Figure 1F**). To assess the 3D morphology of individual KV cells residing in either the  
121 anterior or posterior region of the KV organ, we used the lumen surface as a reference point to  
122 ensure that all 3D datasets were analyzed from the same perspective. To make morphometric  
123 measurements, we defined three axes of KV cells: 1) cellular 'height (H)' is the length of the axis  
124 connecting dorsal and ventral surfaces of the cell, 2) cellular 'length (L)' is the length of the axis  
125 connecting apical (associated with the lumen) and basal surfaces of the cell, and 3) cellular  
126 'width (W)' is the length of the axis connecting two lateral sides of the cell (**Figure 1G,H**). The  
127 combination of mosaic labeling, live imaging and 3D cell morphometrics provides a new  
128 approach to investigate the cellular and mechanical mechanisms underlying KV epithelial  
129 morphogenesis at single cell resolution.

130

131 To assess the dynamics of KV cells in 3D, we first performed time-lapse imaging of  
132 mosaic labeled KVs in live *Tg(sox17:Cre<sup>ERT2</sup>); Tg(ubi:Zebrawow)* embryos from the 2-somite  
133 stage (2 ss) when the lumen first forms to the 8 somite stage (8 ss) when the lumen is fully  
134 expanded (Amack et al., 2007, Wang et al., 2012, Gokey et al., 2016). These stages span the  
135 process of KV remodeling when KV cells change their shapes: 2 ss is pre-remodeling and 8 ss

136 is post-remodeling (Wang et al., 2012). Time-lapse images from these stages indicated KV cells  
137 are highly dynamic during KV morphogenesis (**Movie 3**). To quantify KV cell dynamics, we took  
138 several precautions in subsequent experiments to avoid artifacts. First, to avoid potential  
139 photobleaching from time-lapse imaging, live embryos were imaged only once at one stage of  
140 development—not continuously or at multiple stages. Second, to avoid differences in  
141 fluorescence signal due to differences in imaging depth, all KVs were visualized laterally (YZ  
142 orientation) and only mosaically labeled cells from the middle plane of the KV organ that is  
143 perpendicular to the dorso-ventral axis were selected for analysis (**Figure 2A**). We define the  
144 middle plane as the plane with the largest lumen diameter when viewed dorsally. Finally, we  
145 determined that the Cre activity was not spatially biased, but rather randomly labeled cells  
146 throughout the KV. By analyzing enough embryos, we sampled KV cells from all positions along  
147 the middle plane of KV at different stages of development (**Figure 2-figure supplement 1**).

148

149 To quantify the morphometric properties of KV-ant and KV-post cells during KV  
150 morphogenesis, live embryos with mosaic labeled KVs were imaged at a specific stage of  
151 development (2 ss, 4 ss, 6 ss and 8 ss) and then individual cells at the middle plane of the  
152 organ were volume-rendered (**Figure 2B**). We measured the height, length and width of KV  
153 cells from several wild-type embryos to determine the average parameters for KV-ant and KV-  
154 post cells. The results showed cell-to-cell variability, but pooling measurements from multiple  
155 cells at a specific developmental stage identified trends and statistically significant differences  
156 during KV morphogenesis. First, cell height of both KV-ant cells and KV-post cells increased  
157 from 2 ss to 8 ss (**Figure 2C**), reflecting the expansion of the apical surface of cells (see dotted  
158 line in **Figure 2B**) to accommodate lumen growth. There were no significant differences in cell  
159 height between KV-ant cells and KV-post cells during these stages (**Figure 2C**). Second, cell  
160 length decreased in both KV-ant cells and KV-post cells during KV morphogenesis, but a sharp  
161 reduction was observed from 4 ss to 6 ss in KV-post cells (**Figure 2D**). This resulted in the cell  
162 length of KV-post cells to become significantly different from KV-ant cells after 4 ss. Importantly,  
163 it is between 4 ss to 6 ss when cell shape changes associated with KV remodeling were  
164 previously observed (Compagnon et al., 2014, Wang et al., 2012). Third, analysis of cell width  
165 indicated KV-ant cells remained relatively constant during KV morphogenesis, whereas KV-post  
166 cells showed a distinctive increase in width between 4 ss and 6 ss that resulted in significant  
167 differences between KV-ant cells and KV-post cells after 4 ss (**Figure 2E**). In order to make  
168 comparisons with previous 2D studies, we calculated length-to-width ratios (LWR) to describe

169 cell morphology. We found that both KV-ant and KV-post cells had similar morphologies at 2 ss  
170 and 4 ss and that these morphologies changed after 4 ss such that KV-ant cells had a  
171 significantly larger LWR than KV-post cells (**Figure 2F**). This analysis of individual KV-ant and  
172 KV-post cell shapes is consistent with asymmetric cell shape changes associated with KV  
173 remodeling that were previously identified using 2D measurements of KV cell LWRs (Wang et  
174 al., 2012) and provides for the first time a 3D quantification of epithelial cell morphodynamics  
175 that occur during KV development.

176

### 177 **3D analysis of single cells reveals asymmetric cell volume changes during KV** 178 **morphogenesis**

179 We next used mosaic labeling to address whether the size of individual KV cells  
180 changes during development. Measuring the volume of 3D reconstructed KV cells revealed  
181 striking dynamics in cell size that mirrored changes in cell shape. At 2 ss and 4 ss, KV-ant and  
182 KV-post cells showed similar cell volumes (**Figure 2G**). However, between 4 ss to 6 ss—when  
183 KV cells change shape—the volume of KV-ant cells increased and the volume of KV-post cells  
184 decreased (**Figure 2G**). Cell volumes were significantly different between KV-ant and KV-post  
185 after 4 ss (**Figure 2G**). Thus, asymmetric cell volume changes along the AP axis occur during  
186 the same stage as AP asymmetric cell shape changes. Overall, between 2 ss and 8 ss, KV-ant  
187 cells increased volume from  $2106 \pm 1014 \mu\text{m}^3$  to  $2547 \pm 693 \mu\text{m}^3$  (shown are mean  $\pm$  one  
188 standard deviation) and KV-post cell decreased volume from  $2180 \pm 1034 \mu\text{m}^3$  to  $1564 \pm 539$   
189  $\mu\text{m}^3$  (**Figure 2G**). The considerable standard deviations here likely reflect the high degree of  
190 variability in KV size among wild-type embryos (Gokey et al., 2016). It is important to note that  
191 while the cell sizes are variable, the direction of size changes during development is constant.  
192 KV-ant cells always increase in volume and KV-post cells always decrease in volume. This  
193 identification of asymmetric cell volume changes provides new insight into the mechanics of  
194 epithelial morphogenesis in KV.

195

196 To better understand volume changes during KV development, we measured the volume  
197 of the entire KV organ at different stages. To make these measurements in live embryos,  
198 *Tg(sox17:GFP-CAAX)* transgenic fish were crossed with *Tg(actb2:myl12.1-MKATE2)* zebrafish  
199 that have enriched apical membrane expression of the fluorescent mKate2 protein fused to  
200 Myl12.1 (myosin light chain 12 genome duplicate 1) in KV cells. Double transgenic  
201 *Tg(actb2:myl12.1mKATE2; Tg(sox17:GFP-CAAX)* embryos were used to visualize both KV

202 lumen and KV cells in living embryos (**Figure 2-figure supplement 2A**). The KV lumen was  
203 reconstructed in 3D using *Tg(actb2:myl12.1-MKATE2)* expression and then divided into two  
204 equal halves (hence equal volumes) along the AP axis (**Figure 2-figure supplement 2B,B'**).  
205 Next, the total KV cellular component of KV-ant and KV-post cells was reconstructed using  
206 *Tg(sox17:GFP-CAAX)* expression (**Figure 2-figure supplement 2B,B'**). Volume measurements  
207 indicated that both 'total KV-ant cellular volume' and 'total KV-post cellular volume' were similar  
208 at 2 ss, but then were significantly different at 8 ss (**Figure 2-figure supplement 2C**). Overall,  
209 'total KV-ant cellular volume' increased from  $1.4 \times 10^5 \mu\text{m}^3$  to  $1.7 \times 10^5 \mu\text{m}^3$  and 'total KV-post cell  
210 volume' decreased from  $1.2 \times 10^5 \mu\text{m}^3$  to  $0.98 \times 10^5 \mu\text{m}^3$  between 2 ss and 8 ss stages (**Figure 2-**  
211 **figure supplement 2C**). Thus, consistent with volume changes in single cells at the middle  
212 plane of KV, we observed asymmetric volume changes along the anterior and posterior axis of  
213 KV when the entire cellular component of the organ was analyzed. These results suggested that  
214 asymmetric cell volume changes might contribute to lumen growth and/or cell shape changes  
215 during the concurrent processes of lumen expansion and epithelial morphogenesis in KV.

216

### 217 **Inhibiting ion flux disrupts asymmetric cell volume changes, lumen expansion and cell** 218 **shape changes in KV**

219 We next sought to identify a mechanism that mediates KV cell volume changes between  
220 2 ss and 8 ss. At the molecular level, cellular volume can be controlled through coordinated flux  
221 of  $\text{Na}^+$ ,  $\text{K}^+$  and  $\text{Cl}^-$  ions via specific ion channels and pumps that results in osmotically driven  
222 water transport (Wilson et al., 2007, Barrett and Keely, 2000, Frizzell and Hanrahan, 2012,  
223 Frizzell, 1995, Damkier et al., 2013, Spring and Siebens, 1988, Hoijman et al., 2015, Saias et  
224 al., 2015). To test whether cell volume changes in KV cells are mediated by ion flux, we  
225 inhibited either the sodium-potassium pump ( $\text{Na}^+/\text{K}^+$ -ATPase) or the cystic fibrosis  
226 transmembrane conductance regulator (Cftr). Both have previously been shown to play a role in  
227 KV lumen expansion (Navis et al., 2013, Compagnon et al., 2014). We first treated mosaic-  
228 labeled (e.g. 4-OHT treated) *Tg(sox17:Cre<sup>ERT2</sup>); Tg(ubi:ZebraBow)* embryos with the small  
229 molecule ouabain to inhibit the  $\text{Na}^+/\text{K}^+$ -ATPase pump as previously described (Compagnon et  
230 al., 2014). The  $\text{Na}^+/\text{K}^+$ -ATPase has a central role in generating an electrochemical gradient  
231 across the plasma membrane that drives transport of water and solutes (Wilson et al., 2007,  
232 Damkier et al., 2013). Ouabain treatments are known to disrupt ion flux, resulting in an increase  
233 in intracellular sodium and calcium concentrations. In these experiments, control embryos  
234 treated with vehicle (DMSO; dimethyl sulfoxide) had mosaic labeled KV-ant and KV-post cells

235 that had similar morphologies at 2 ss and quite different morphologies at 8 ss (**Figure 3A**).  
236 Similar to wild-type embryos, the KV lumen expanded in DMSO treated control embryos  
237 between 2 ss and 8 ss and mosaic labeled cells in these KVs underwent normal AP asymmetric  
238 changes in cell volume and shape (**Figure 3A,E**). Embryos treated with ouabain from the bud  
239 stage (10 hpf) to 8 ss (13 hpf) showed reduced KV lumen expansion (**Figure 3B,E**), which is  
240 consistent with previous results (Compagnon et al., 2014). We next tested whether inhibiting  
241 Na<sup>+</sup>/K<sup>+</sup>-ATPase activity has an impact on KV cell volume dynamics. In control embryos, KV-ant  
242 cells increased volume from 2019 ± 668 μm<sup>3</sup> to 2304 ± 618 μm<sup>3</sup> and KV-post cells decreased  
243 volume from 1811 ± 422 μm<sup>3</sup> to 1479 ± 323 μm<sup>3</sup> between 2 ss and 8 ss (**Figure 3A**). In contrast,  
244 AP asymmetric cell volume changes were not observed in embryos treated with ouabain. In  
245 ouabain treated embryos both KV-ant and KV-post cells increased volume from 1582 ± 818 μm<sup>3</sup>  
246 to 2328 ± 1050 μm<sup>3</sup> and from 1551 ± 286 μm<sup>3</sup> to 2407 ± 493 μm<sup>3</sup> respectively (**Figure 3B**).  
247 These results support a model in which ion flux mediates asymmetric cell volume changes  
248 during KV morphogenesis.

249

250 As a second approach to test the role of ion flux in regulating KV cell volumes, we  
251 interfered with Cftr activity. Cftr is an apically localized chloride channel that moves Cl<sup>-</sup> ions out  
252 of the cell and establishes electrochemical gradients, which drive water into the lumen through  
253 osmosis (Navis and Bagnat, 2015). Cftr activity can also modulate several other ion-channels  
254 and transporters (Vennekens et al., 1999), making it a key driver of ion flux and fluid secretion  
255 (Braunstein et al., 2004, Valverde et al., 1995). Mosaic-labeled embryos were treated with the  
256 pharmacological compound CFTRinh-172 to inhibit Cftr activity (Roxo-Rosa et al., 2015) or a  
257 previously characterized antisense Cftr morpholino oligonucleotide (Cftr MO) (Gokey et al.,  
258 2016) to reduce Cftr protein expression. Treating embryos with 30 μM CFTRinh-172 from bud  
259 stage to 8 ss reduced KV lumen expansion (**Figure 3C,E**) as expected (Roxo-Rosa et al.,  
260 2015). To test whether Cftr has a role in modulating KV cell size, we performed a 3D analysis of  
261 mosaic labeled single cells. Similar to ouabain treatments, CFTRinh-172 treatments eliminated  
262 asymmetric volume changes in KV cells. In contrast to controls (**Figure 3A**), KV-post cells in  
263 CFTRinh-172 treated embryos did not lose volume, but rather increased in volume from 1878 ±  
264 361 μm<sup>3</sup> to 2079 ± 857 μm<sup>3</sup>. KV-ant cells increased in volume from 1530 ± 289 μm<sup>3</sup> to 1917 ±  
265 477 μm<sup>3</sup> (**Figure 3C**). Reducing Cftr expression by injecting embryos with Cftr MO had effects  
266 that were similar to CFTRinh-172 treatments: KV lumen failed to expand and asymmetric cell  
267 volume changes were disrupted (**Figure 3D,E**). In Cftr MO treated embryos both KV-ant and



268 KV-post cells increased their volume from  $2047 \pm 725 \mu\text{m}^3$  to  $2252 \pm 842 \mu\text{m}^3$  and from  $2039 \pm$   
269  $745 \mu\text{m}^3$  to  $2367 \pm 770 \mu\text{m}^3$  respectively (**Figure 3D**). This suggests that in both CFTRinh-172  
270 and Cfr MO treated embryos KV-post cells fail to undergo volume loss due to inhibition of fluid  
271 efflux from these cells. Taken together, these results indicate ion flux regulated by  $\text{Na}^+/\text{K}^+$ -  
272 ATPase and Cfr activity is a mechanism that drives asymmetric changes in KV cell volumes  
273 along the AP axis.

274 We next evaluated the impact of perturbing ion flux on cell shape changes during KV  
275 remodeling. The height (apical surfaces) of KV cells did not increase between 2 ss and 8 ss in  
276 embryos treated with inhibitors of  $\text{Na}^+/\text{K}^+$ -ATPase or Cfr activity as they did in controls (**Figure**  
277 **3-figure supplement 1A**), which is consistent with a failure of lumen expansion. Analysis of  
278 length to width ratios (LWRs) of individual KV-ant and KV-post cells revealed that AP  
279 asymmetric cell shape changes observed in control embryos between 2 ss and 8 ss (**Figure**  
280 **3A**) failed to occur in embryos treated with ouabain or Cfr inhibitors (**Figure 3B-D**). These  
281 results indicated that ion flux is necessary for both cell volume changes and cell shape changes  
282 during KV remodeling.

283 Since our ion flux inhibitor treatments were global, we wanted to test whether blocking  
284 ion channels altered other tissues in the embryo, including cells surrounding KV that could have  
285 an impact on KV cell shapes. Since the effect of loss of Cfr function on KV has already been  
286 determined genetically (Navis et al., 2013), we focused on the effects of ouabain treatments on  
287 external cells. The overall morphology of ouabain treated embryos was similar to controls at 8  
288 ss, except the KV lumen was smaller (**Figure 3-figure supplement 2A**), indicating ouabain  
289 treatments did not cause severe developmental defects. To analyze cells surrounding KV, we  
290 ubiquitously expressed a membrane-localized mCherry (*mCherry-CAAX*) in *Tg(sox17:GFP-*  
291 *CAAX)* embryos that allowed us to simultaneously visualize both KV cells at the middle plane of  
292 KV and the surrounding external cells (**Figure 3-figure supplement 2B**). Due to lack of a  
293 reference frame (e.g. the lumen surface) to quantitate LWRs of surrounding cells, we used a  
294 different parameter called the 'cell shape index,  $q$ ' ( $q = [(cell\ cross\ sectional\ perimeter)/\sqrt{(cell$   
295  $cross\ sectional\ area)}]$ ) to define surrounding cell morphology (Bi et al., 2016). Analysis of  
296 external cells with clearly defined boundaries (*mCherry-CAAX* labeling) that were positioned  
297 either anterior or posterior of KV indicated that there was no significant difference in cell shapes  
298 at 2 ss or 8 ss stages between control or ouabain treated embryos (**Figure 3-figure**  
299 **supplement 2C**). These results indicate that ouabain does not alter the shapes of cells

300 surrounding KV and suggest that defects in KV cell shape changes result from altered ion flux in  
301 KV. This is consistent with a previous study (Compagnon et al., 2014), in which blocking ion flux  
302 suggested forces associated with lumen expansion drive KV remodeling. However, because our  
303 3D analyses showed that altering ion flux disrupts both lumen expansion and KV cell volume  
304 changes, it remained unclear whether failed cell shape changes were due to defects in lumen  
305 expansion or asymmetric cell volume dynamics or both.

### 306 **Mathematical simulations of KV cell shape changes**

307 To begin to tease apart how intrinsic cell size changes and extrinsic lumen expansion  
308 forces contribute to asymmetric KV cell shape changes, we developed and simulated a  
309 mathematical vertex model for cell shapes in KV. Vertex models, which have been used  
310 successfully by our group and others for predicting features of developing tissues (Fletcher et  
311 al., 2014, Bi et al., 2015, Farhadifar et al., 2007, Hufnagel et al., 2007, Wang et al., 2012),  
312 represent two-dimensional cross-sections of cells in a tissue as a network of edges and  
313 vertices, as shown in **Figure 4A-D**. Adhesion molecules and cytoskeletal machinery generate  
314 forces that affect cell shape in different ways. In the vertex model, the balance between these  
315 forces is represented by an effective interfacial tension parameter  $\Lambda$ . Positive interfacial  
316 tensions describe cytoskeletal forces that tend to decrease interface lengths, while negative  
317 interfacial tensions describe adhesion effects that tend to increase interface lengths.  
318 Additionally, cellular volume control is described in the 2D vertex model by a preferred cross  
319 sectional area  $A_0$  that the cells strive to attain. Deviations of a cell's actual area from its  
320 preferred area correspond to cellular pressures. A so-called "conjugate gradient" computer  
321 algorithm was applied to alter the positions of the vertices based on the forces acting on them  
322 until a relaxed state is reached where all interfacial tensions are balanced by cellular pressures.  
323 Additional details about the model and the computer algorithm can be found in the supplemental  
324 materials.

325

326 Using the vertex model, we studied whether the observed AP asymmetry in KV cell  
327 volume changes could act upstream of the observed AP asymmetry in KV cell shapes as  
328 described by aspect ratios. To this end, we focused our modeling efforts on the middle plane of  
329 the KV (**Figure 4A-D**). We first measured the cross-sectional areas of KV cells within this plane  
330 and found that changes in cell cross-sectional areas correlated with the corresponding cell  
331 volume changes (**Figure 4 – supplement table 1**). Thus, to test whether KV cell volume

332 changes can be sufficient to induce changes in KV cell aspect ratios, we prescribed the  
333 measured cross-sectional areas for KV lumen and KV cells (**Figure 4 – supplement table 2**) as  
334 preferred areas  $A_0$  in our model and then studied the induced AP asymmetry of KV cell aspect  
335 ratio.

336

337 To simulate KV cell shape changes, we initialized a vertex model where a lumen is  
338 surrounded by  $2N$  adjacent KV cells (split into KV-ant and KV-post cells with  $N$  chosen between  
339 8 and 12) and the KV organ is surrounded by 100 “external” cells. To understand how the  
340 volume changes between 2 ss and 8 ss affect cell shape, we do not take into account the full  
341 time-dependent evolution of the system. Rather, we performed quasi-static simulations  
342 consisting of two parts. Initially, preferred area values  $A_0$  for lumen, KV-ant cells, and KV-post  
343 cells were set equal to the respective 2 ss values reported in the first column of **Figure 4-**  
344 **supplement table 2**, and the system was relaxed to a force-balanced state using our computer  
345 algorithm (upper panels in **Figure 4A-D**). Subsequently, the preferred area values  $A_0$  were  
346 changed to their respective values at 8 ss chosen from the second column of **Figure 4-**  
347 **supplement table 2** and the system was relaxed again (lower panels in **Figure 4A-D**). Such a  
348 quasi-static approach is appropriate if in the zebrafish KV, relaxation to mechanical equilibrium  
349 is faster than the volume changes of lumen and KV cells. In other developing epithelia, this  
350 relaxation timescale has been measured using laser ablation and is on the order of seconds  
351 (Fernandez-Gonzalez et al., 2009), which is significantly faster than the rate of lumen volume  
352 expansion, which is on the order of hours. Note that the images in **Figure 4A-D** are cropped to  
353 focus on the KV rather than the surrounding cells (same for **Figure 4 – figure supplements**  
354 **2,3A-D**). We show the full system for **Figure 4A** in **Figure 4 – figure supplement 1B**.

355

356 There are still additional free parameters in the model, corresponding to the interfacial  
357 tension values for each cell, but these are not constrained by experimental data. Therefore, we  
358 decided to perform a wide parameter sweep to determine how these parameters affect cell  
359 shapes. In previous work (Wang et al., 2012), we demonstrated that AP asymmetric interfacial  
360 tensions were sufficient to drive KV cell shape remodeling even in the absence of asymmetric  
361 volume changes. To analyze whether asymmetric area changes alone are sufficient to drive the  
362 asymmetric KV cell shape changes, we choose the interfacial tensions between KV cells,  
363  $\Lambda^{\text{KV-KV}}$ , to be identical between KV-ant and KV-post cells. For simplicity, we assume that all

364 cells external to the KV all have the same interfacial tension  $\Lambda^{\text{ext-ext}}$ , which is allowed to differ  
365 from  $\Lambda^{\text{KV-KV}}$ . For the purpose of illustration, we show two example simulations for different te-  
366 nsion pairs  $(\Lambda^{\text{KV-KV}}, \Lambda^{\text{ext-ext}})$  in **Figure 4A,B**. In **Figure 4A** with  $\Lambda^{\text{KV-KV}} = -50$  and  $\Lambda^{\text{ext-ext}} =$   
367 150, KV-ant cells at 8 ss appear narrow and elongated while KV-post cells appear wide and  
368 short, qualitatively reflecting the experimentally observed KV cell shape asymmetry at 8 ss.  
369 However, in **Figure 4B** with  $\Lambda^{\text{KV-KV}} = 50$  and  $\Lambda^{\text{ext-ext}} = -120$ , KV-ant and KV-post cells at 8 ss  
370 have very similar morphology, suggesting no cell shape change. To quantitatively compare  
371 simulations with experimental data, we developed a metric that captures the anterior-posterior  
372 asymmetry (APA) of KV cell shapes that is characteristic of KV remodeling. APA is defined as  
373 the difference between the length-width ratios (LWRs) of KV-ant and KV-post cells:  $\text{APA} =$   
374  $\text{LWR-ant} - \text{LWR-post}$  (for the definition of the LWR, see **Figure 4 – figure supplement 1A**).  
375 Note that because the definition of the APA is based on length-to-width ratios, it is size-  
376 independent. In our *in vivo* measurements, wild-type embryos at 8 ss correspond to an APA  
377 value of  $\sim 0.9$ . For the simulation shown in **Figure 4B**, we found an APA value of 0, suggesting  
378 no asymmetry, while the simulation in **Figure 4A** has APA value of 0.29, which is clearly  
379 asymmetric but not as high as in wild-type experiments.

380

381 Because the interfacial tensions  $\Lambda^{\text{KV-KV}}$  and  $\Lambda^{\text{ext-ext}}$  cannot be determined from our  
382 experimental data, an obvious question is whether there is *any* choice of those tension values in  
383 our model that would allow area changes alone to drive the observed shape changes. **Figure**  
384 **4E** is a plot of APA as the interfacial tension in KV cells and external cells are varied. For each  
385  $(\Lambda^{\text{KV-KV}}, \Lambda^{\text{ext-ext}})$  parameter pair, the indicated APA value represents an average computed  
386 from 100 individual simulation runs. Blue areas indicate a positive APA corresponding to regions  
387 where KV-ant cells are more radially elongated than KV-post cells are, while red regions  
388 indicate negative APA corresponding to regions with more elongated KV-post cells. A first  
389 observation is that the APA is never above 0.31, which is much smaller than wild-type  
390 experimental observations. This suggests that changes to cross-sectional area may be an  
391 important contribution to shape remodeling, but alone they are not sufficient to generate the  
392 observed shape changes.

393

394 A second observation is that there are coherent regions in parameter space with similar  
395 values of APA, which suggests that our model may be able to identify a simple mechanism for

396 how changes to cross-sectional area drive shape change. It has recently been discovered that  
397 as cells increase their interfacial tension  $\Lambda$  or increase their preferred area  $A_0$ , the tissue  
398 transitions from fluid-like to solid-like behavior, undergoing a so-called rigidity transition (Bi et al.,  
399 2014, Bi et al., 2015, Park et al., 2015). Moreover, some of us have recently reported that a  
400 similar fluid-solid transition also occurs in bulk three-dimensional tissues (Merkel and Manning,  
401 2017). Therefore, we expect that if we can identify a simple mechanism for 2D shape  
402 asymmetry that depends on the fluidity of the surrounding tissue, that same mechanism will also  
403 be present in 3D.

404

405 To do so, we map the results for 2D fluid-solid transitions onto our model, where black  
406 dashed lines in **Figure 4E** indicate phase boundaries between solid and fluid. In the upper right  
407 quadrant of **Figure 4E,F**, both the KV cells and external cells are solid-like (SS), in the lower  
408 right quadrant external cells are fluid-like while KV cells are solid-like (FS), in the upper left  
409 quadrant KV is fluid-like and external tissue is solid-like (SF), and in the lower left quadrant both  
410 tissues are fluid-like (FF). There is also a small, hatched region of parameter space where KV-  
411 ant cells are solid-like while KV-post cells are fluid-like. To test the significance of our APA  
412 values, we computed the standard error of the APA mean for each  $(\Lambda^{KV-KV}, \Lambda^{ext-ext})$  parameter  
413 pair. We found that for solid-like KV cells, the error is typically on the order of 0.05, indicating  
414 that our results are robust in this regime. Conversely, for fluid-like KV cells, the standard error  
415 of the mean can become much larger, which is reflected in the higher APA fluctuations in this  
416 regime. They are a direct consequence of softer or floppier KV cells, leading to large  
417 fluctuations in their LWRs.

418

419 Interestingly, our model predicts that cross-sectional area changes drive the observed  
420 shape changes primarily in the solid-solid region, and our understanding of the fluid-solid  
421 transition helps us to understand this effect (**Figure 4G**). When the external cells are fluid-like,  
422 the KV cells are able to slide past the external cells, so that the interface between the KV-ant  
423 and KV-post cells (indicated by a thick black line in **Figure 4G**) moves towards the posterior as  
424 the area of the KV-post cells is reduced. In contrast, when the external cells are solid-like, the  
425 interface between the KV-ant and KV-post cells is pinned. In this second case, when the KV-  
426 post cells lose area they must maintain their lateral width and so the apico-basal extension must  
427 decrease. We note that this proposed mechanism works equally well in 3D as in 2D -- solid-like  
428 external tissue would pin the anterior-posterior interface so that cell volume changes would

429 affect the area of lateral interfaces between KV cells but not the apical area in contact with the  
430 lumen. Therefore, in 3D asymmetric cell volume changes would lead to asymmetric cell shape  
431 changes and similar APA values to the ones we identified in our 2D model. Although we cannot  
432 rule out a more complex model for KV cell shape changes (e.g. with additional parameters  
433 characterizing the mechanical heterogeneities in each cell), our simple model suggests that  
434 asymmetric cell volume changes contribute to cell shape changes, though additional  
435 mechanisms are necessary to explain the very high APA values that are observed in  
436 experiments.

437

438         The number of epithelial cells in KV can vary in a wild-type population (Gokey et al.,  
439 2016), therefore we checked the robustness of our result (APA values) with respect to small  
440 changes in  $N$ . In particular, while **Figure 4** shows the simulation results for  $N = 10$  KV-ant and  
441 KV-post cells, **Figure 4-figure supplements 2-3** show the corresponding results for  $N = 8$  and  
442  $N = 12$ , respectively. In particular, independent of  $N$ , we observe positive APA only in the  
443 regime where both KV and external cells are solid-like. Moreover, there is a general trend of  
444 higher APA for a smaller KV cell number. Note that in addition to the mechanism creating the  
445 AP cell shape asymmetry illustrated in **Figure 4G**, which works largely independent of  $N$ , we  
446 have also discovered a quite different mechanism, which only works for small  $N$  if KV-ant cells  
447 are solid and KV-post cells are fluid (for details, see Supplemental Information). In this case,  
448 KV-post cells are more easily deformed and accommodate the lumen expansion by increasing  
449 their apical lumen interface, which leads to flatter KV-post cells and thus a high APA at 8 ss  
450 (see **Figure 4-figure supplement 2E**). Note however that this mechanism depends on lumen  
451 expansion (compare **Figure 4-figure supplement 2F**).

452

453         Another benefit of the model is that we can test specific hypotheses prior to exploring  
454 them experimentally. First, to investigate whether lumen expansion is necessary to create an  
455 asymmetry in KV cell elongation, we repeated the numerical simulations shown in **Figure**  
456 **4A,B,E** — which included both asymmetric cell cross-sectional area changes and increase in  
457 lumen cross-sectional area between 2 ss and 8 ss — except in this simulation we kept the  
458 lumen cross-sectional area fixed (**Figure 4C,D,F**). The APA values, shown in **Figure 4F** are  
459 generally smaller (max. APA value of 0.23) than those in **Figure 4E** (max APA value of 0.31).  
460 However, most of the regimes where both KV and external cells are solid-like still show positive  
461 APA values. These results suggest that in an environment in which cells have solid-like

462 mechanical properties, asymmetric volume changes in KV cells can partially drive asymmetric  
463 KV cell shape changes even in the absence of lumen expansion (**Figure 4H**).

464

465         Second, using our model, we can explore whether heterogeneous mechanical properties  
466 of the external cells can have a significant effect on KV cell shape changes. So far, we have in  
467 our model described all external cells using the same parameters. However, given the presence  
468 of morphogenetic gradients along the AP axis within the presomitic mesoderm that include FGF  
469 and Wnt signals (Oates et al., 2012), it is plausible that the mechanical properties of the tailbud  
470 cells surrounding the KV may also show an AP-oriented gradient. Moreover, the KV is  
471 anteriorly abutting the notochord with likely different mechanical properties from the tailbud cells.  
472 We thus wondered how our simulation results would depend on such heterogeneities of the  
473 external cells. To study this question, we performed simulations similar to that shown in **Figure**  
474 **4A** where we additionally allowed all external cells on either the posterior side or the anterior  
475 side to be fluid (**Figure 4 – figure supplement 4A** and **B**, respectively). These fluid-like  
476 subsets of the external cells have an interfacial tension of  $\Lambda^{\text{ext-ext}} = -120$  (as in **Figure 4B**). All  
477 other parameters were chosen as in **Figure 4A**, which included asymmetric cell cross-sectional  
478 area changes and lumen expansion. In particular, the solid external cells had  $\Lambda^{\text{ext-ext}} = 150$ .  
479 We found that AP cell asymmetry was much more pronounced if only the anterior external cells  
480 were solid (**Figure 4 – figure supplement 4A**) than if only the posterior cells were solid (**Figure**  
481 **4 – figure supplement 4B**). For the solid anterior external cells, the average APA computed  
482 from 100 simulations was 0.39 with a standard error of the mean of 0.03. Thus, solidity of only  
483 the anterior cells can be sufficient to create an asymmetry of KV cell shapes that can be slightly  
484 stronger than if all external cells were solid. Conversely, the average APA with solid external  
485 cells only posteriorly was only 0.07 with a standard error of the mean of 0.04. Thus, if there are  
486 solid cells only posteriorly, the induced AP asymmetry in KV cell shape was much weaker.  
487 Hence, asymmetry in the mechanical properties of the cells (and/or material) surrounding the  
488 KV can support asymmetric cell shape changes in KV.

489

#### 490 **Interfering with Junction plakoglobin function inhibits KV lumen expansion**

491         We were intrigued by our modeling results that predicted that given the right environment  
492 of surrounding cells, changes in KV cell volumes contribute to changes in KV cell shapes even  
493 when the lumen fails to expand. To test this prediction experimentally, we wanted to take an  
494 approach that would allow us to monitor cell shape changes in KVs in which ion flux and cell

495 volume changes occur normally but lumen expansion is inhibited. Since coordinated remodeling  
496 of adherens junctions between epithelial cells plays important roles during lumen formation  
497 (Alvers et al., 2014), we chose to interfere with junctions between adjacent KV cells to disrupt  
498 lumen growth. The adherens junction component E-cadherin has been linked to cell junction  
499 stability and barrier function that maintains luminal and tubular structures (Tay et al., 2013,  
500 Tunggal et al., 2005). E-cadherin is expressed in KV cells (Matsui et al., 2011, Tay et al., 2013),  
501 but loss of E-cadherin function in mutant embryos leads to early developmental defects during  
502 epiboly that preclude analysis of KV formation (Kane et al., 2005). We therefore needed tools  
503 that allow junctions to form, but with weakened integrity that allows fluid to leak out of the lumen.  
504 Transcriptome analysis of zebrafish KV cells (unpublished data) indicated that Junction  
505 plakoglobin (Jup; also called  $\gamma$ -catenin) is expressed in KV cells. Jup interacts in complexes at  
506 cell-cell adhesions (Fukunaga et al., 2005, Lewis et al., 1997) and is thought to link cadherins to  
507 the cytoskeleton (Kowalczyk et al., 1998, Leonard et al., 2008, Holen et al., 2012). Previous  
508 studies in cell cultures indicated Jup plays an essential role in maintaining cell-cell adhesions  
509 (Fang et al., 2014) and that perturbing Jup function results in increased epithelial permeability  
510 (Nottebaum et al., 2008). The zebrafish genome contains two *jup* genes, *jupa* and *jupb*. RNA *in*  
511 *situ* hybridizations confirmed *jupa* expression in KV cells and the population of precursor cells  
512 that give rise to KV called dorsal forerunner cells (DFCs) (**Figure 5-figure supplement 1**).  
513 Immunofluorescence experiments using Jup antibody (Martin et al., 2009) indicated Jupa  
514 protein is localized to lateral membranes of KV cells that are marked by GFP expression in  
515 *Tg(sox17:GFP-CAAX)* embryos (**Figure 5A**). Thus, we predicted that interfering with Jupa  
516 function would perturb KV cell-cell junction integrity such that the KV lumen would fail to expand  
517 properly.

518

519 To test the function of Jupa in KV morphogenesis we used an antisense morpholino  
520 (MO) to block *jupa* pre-mRNA splicing (*jupa* MO-1) or a previously reported MO that blocks  
521 translation (*jupa* MO-2) of *jupa* mRNA (Martin et al., 2009). Injection of either *jupa* MO  
522 efficiently reduced Jupa protein levels at KV cell junctions, as compared to embryos injected  
523 with a negative control MO (**Figure 5A; Figure 5-figure supplement 2A**). Reduction of Jupa  
524 expression was also confirmed using immunoblotting. Jupa antibody detected a prominent band  
525 (arrowhead) around 75 kDa—consistent with Jupa proteins (~75-80 kDa) in other vertebrates  
526 (McKoy et al., 2000)—that was significantly reduced in *jupa* MO injected embryos (**Figure 5B**).  
527 Interfering with Jupa expression with MOs did not alter the gross morphology of embryos at 8



528 ss, but did disrupt KV lumen expansion relative to controls (**Figure 5C,D**) as predicted. ZO-1  
529 immunostaining of apical tight junctions was used to assess the severity of lumen expansion  
530 defects *jupa* MO treated embryos (**Figure 5C**). Delivering *jupa* MO specifically to the DFCs  
531 (Amack and Yost, 2004) that give rise to KV also disrupted lumen expansion (**Figure 5C,D**),  
532 indicating Jup functions cell-autonomously during KV morphogenesis. Importantly, the effect on  
533 KV lumen expansion caused by MO injection was significantly rescued by co-injection of full-  
534 length *jupa* mRNA (**Figure 5C,D; Figure 5-figure supplement 2B**), indicating specificity for this  
535 phenotype. As a second approach to compromise Jupa function, we injected a human *JUP*  
536 mRNA with a mutation that causes naxos disease (McKoy et al., 2000). This mutant '*JUP*-  
537 naxos' mRNA has previously been shown to encode a dominant-negative protein that interferes  
538 with Jup function in zebrafish (Asimaki et al., 2014). Similar to *jupa* MO treatments, expression  
539 of the *JUP*-naxos mRNA reduced KV lumen expansion without inducing other overt defects  
540 (**Figure 5C,D**). Importantly, the number of ciliated cells in KV in *jupa* MO and *JUP*-naxos mRNA  
541 treated embryos was similar to controls (**Figure 5E; Figure 5-figure supplement 2C**), which  
542 demonstrates that small KV lumen area was due to reduced lumen expansion rather than a  
543 reduced number of KV cells.

544

545 We next tested our prediction that loss of Jupa weakens cell-cell adhesions that are  
546 necessary for KV lumen expansion. First, we found that reducing Jupa expression moderately  
547 reduced E-cadherin enrichment (~22% decrease) along KV cell lateral domains relative to  
548 controls (**Figure 5-figure supplement 3**), which is consistent with previous results in cell culture  
549 studies (Fang et al., 2014). This finding suggested that although E-cadherin is maintained at  
550 levels sufficient for epiboly movements and KV formation, the cell-cell adhesions in KV might be  
551 weaker in Jupa depleted embryos than in wild-type. To test this functionally, we treated embryos  
552 with a small molecule activator of the Cftr channel (CFTRact-09) that increases Cl<sup>-</sup> ion flux and  
553 can over-inflate the KV lumen (Gokey et al., 2016). Treatment of control MO embryos with  
554 CFTRact-09 significantly increased KV lumen area (~50%) as compared to DMSO, but a similar  
555 increase was not observed in Jupa depleted embryos (**Figure 5F**). This suggested that fluids  
556 entering the lumen were leaking out through compromised cell-cell junctions. To test this  
557 directly, we injected a solution containing fluorescent dextran into the KV lumen. In 4 out of 5  
558 control MO embryos the dextran remained in the lumen over a 1-hour time period. Conversely,  
559 in most Jupa depleted embryos the dextran gradually leaked out and only 1 out of 5 embryo  
560 retained significant amounts of dye (**Figure 5G**). Together, these results indicate Jupa functions

561 to maintain KV cell-cell adhesion integrity that is critical for KV lumen expansion, and suggest  
562 Jupa depletion could provide a useful approach to block lumen expansion without affecting ion  
563 flux mediated cell volume changes in KV.

564

#### 565 **Asymmetric KV cell shape changes occur independent of lumen expansion**

566 We next used Jupa depleted embryos as a tool to test our hypothesis that KV cell  
567 volume changes impact KV cell shape changes in the absence of forces exerted by the process  
568 of KV lumen expansion. Morphometric analyses of individual KV cells in mosaic-labeled  
569 *Tg(sox17:Cre<sup>ERT2</sup>); Tg(ubi:Zebrawow)* embryos treated with *jupa* MO-1 revealed that  
570 asymmetric KV cell volume changes occurred between 2 ss and 8 ss in Jupa depleted embryos  
571 (KV-ant cells increased volume from  $2015 \pm 534 \mu\text{m}^3$  to  $2283 \pm 414 \mu\text{m}^3$  and KV-post cells  
572 decreased volume from  $1800 \pm 595 \mu\text{m}^3$  to  $1491 \pm 310 \mu\text{m}^3$  that were similar to controls (KV-ant  
573 cells increased volume from  $2108 \pm 719 \mu\text{m}^3$  to  $2709 \pm 774 \mu\text{m}^3$  and KV-post cells decreased  
574 volume from  $2275 \pm 883 \mu\text{m}^3$  to  $1422 \pm 703 \mu\text{m}^3$ )(**Figure 6A,B**). 3D analysis of cell shapes—  
575 assessed using LWRs—indicated that even though the lumen failed to expand (**Figure 6D**;  
576 **Figure 6-figure supplement 1A**), KV-ant and KV-post cells underwent normal asymmetric cell  
577 shape changes in Jupa depleted embryos just as observed in control embryos between 2 ss to  
578 8 ss (**Figure 6A,B**). These results, which are consistent with predictions of the vertex models,  
579 provide *in vivo* evidence that cell shape changes can occur normally during KV remodeling in  
580 the absence of KV lumen expansion.

581

582 To corroborate results obtained using Jupa depleted embryos, we took a second  
583 approach to inhibit lumen expansion by interfering with cell-cell adhesion. We chose to use a  
584 previously characterized MO that inhibits expression of the zebrafish Lgl2 (Lethal giant larvae 2)  
585 protein (Tay et al., 2013). Similar to Jupa depletion, loss of Lgl2 moderately reduces the  
586 accumulation of E-cadherin at lateral KV membranes and blocks KV lumen expansion (Tay et  
587 al., 2013). Analyses of mosaic-labeled KV cells in Lgl2 depleted embryos yielded results that  
588 were very similar to Jupa depleted embryos. Lgl2 depletion inhibited KV lumen expansion in  
589 mosaic labeled embryos (**Figure 6D, Figure 6-figure supplement 1A**), but KV cells completed  
590 normal asymmetric volume changes between 2 ss to 8 ss (KV-ant cells increased volume from  
591  $2057 \pm 303 \mu\text{m}^3$  to  $2329 \pm 847 \mu\text{m}^3$  and KV-post cells decreased volume from  $2187 \pm 457 \mu\text{m}^3$   
592 to  $1617 \pm 336 \mu\text{m}^3$ ) and normal asymmetric cell shape changes during KV remodeling (**Figure**  
593 **6C**). These results are consistent with Jupa knockdown results and indicate that asymmetric

594 epithelial cell shape changes that sculpt the KV organ are separable from the process of lumen  
595 expansion.

596

## 597 **DISCUSSION**

598       The collective behavior of epithelial cells plays a key role in determining the architecture  
599 of tissues and organs. Studies of developmental processes in animal models have provided  
600 important insights into the biochemical signals and mechanical forces that regulate epithelial  
601 morphogenesis (Quintin et al., 2008, Schock and Perrimon, 2002). The zebrafish Kupffer's  
602 vesicle (KV) is a simple organ that provides a useful model system to investigate mechanisms  
603 that regulate epithelial cell shape changes in vivo. Using a mosaic labeling approach and 3D  
604 morphometric analyses of single KV cells, we identified dynamic epithelial cell volume changes  
605 during morphogenesis that are asymmetric along the anteroposterior body axis: KV-ant cells  
606 become larger during development, whereas KV-post cells become smaller. Results from  
607 mathematical simulations (summarized in **Figure 4G-H**) indicate that mechanical properties of  
608 external cells surrounding the KV can impact cell shape changes in the KV, and that when  
609 external cells are solid-like, asymmetric cell volume changes in KV cells contribute to cell shape  
610 changes even in the absence of lumen expansion. Results from experimental perturbations  
611 (summarized in **Figure 7**) indicated that interfering with ion flux prevents AP asymmetric KV cell  
612 volume changes and shape changes during KV remodeling, and that these asymmetric  
613 morphology changes can occur even when expansion of the fluid-filled KV lumen fails due to  
614 weakened KV cell-cell junction integrity. Together, these studies identify asymmetric cell volume  
615 regulation as an intrinsic mechanism that guides cell shape changes during epithelial  
616 morphogenesis in KV. We propose this is a genetically programmed process that depends on  
617 the properties of surrounding cells, but can be separated from the biophysical forces of  
618 lumenogenesis.

619

### 620 **Asymmetric changes in cell size during KV epithelial morphogenesis**

621       The finding that KV cells change volume during development is insightful for thinking  
622 about mechanisms of epithelial morphogenesis in KV since previous analyses (Compagnon et  
623 al., 2014, Wang et al., 2012) that were limited to 2D did not predict differences in KV cell size.  
624 Our previous analysis of 2D cell cross-sectional area (Wang et al., 2012) suggested cells  
625 slightly reduce their size during morphogenesis, but did not detect differences between KV-ant  
626 and KV-post cells. It is therefore striking that 3D analysis shows that KV cells do indeed change

627 volume, and do so asymmetrically along the AP axis. We recently reported that the size of the  
628 KV organ is not under tight control during development, but rather must only exceed a size  
629 threshold to function normally during left-right patterning (Gokey et al., 2016). Thus, KV size can  
630 vary among wild-type embryos. Consistent with these findings, we observed variable KV cell  
631 sizes. However, it is clear that wild-type KV cells always change size in an asymmetric way  
632 along the AP axis. Anterior KV cells always increase their size, whereas posterior cells always  
633 decrease their size. Interfering with the asymmetry of these size changes by blocking ion flux  
634 prevents asymmetric cell shape changes that we know from previous studies (Compagnon et  
635 al., 2014, Wang et al., 2012) are critical for KV function. These results indicate the AP  
636 asymmetry of volume changes is important for KV morphogenesis and function.

637

638         The decrease in KV-post size is mediated by ion channel activity that regulates fluid  
639 movement. Decrease in cell volume has also been observed during morphogenesis of zebrafish  
640 otic vesicle (Hojjman et al., 2015), where it was suggested that movement of fluids from  
641 epithelial cells into the lumen contributes to lumen expansion. It is generally thought that ion flux  
642 in epithelial cells sets up a transepithelial flow of fluids from outside the tissue into the lumen  
643 (Gin et al., 2007, Frizzell and Hanrahan, 2012). When ion flux was blocked in KV via  $\text{Na}^+/\text{K}^+$ -  
644 ATPase or Cfr inhibitors, KV-post cells did not shrink (but swelled) and the lumen failed to  
645 expand. This finding is consistent with a model in which intraepithelial fluid movement directly  
646 from KV-post cells into the lumen promotes lumen expansion. Since the amount of volume lost  
647 by KV-post cells does not fully account for the increase in lumen size, we propose ion flux in KV  
648 establishes both transepithelial flows and intraepithelial flows from KV-post cells to fill the  
649 lumen. The AP asymmetry of cell volume changes during KV morphogenesis suggests different  
650 mechanisms regulate the size of KV-ant vs. KV-post cells. The increase in KV-ant cell size could  
651 involve cell growth. Previous studies have uncovered a role for TOR signaling in cell growth  
652 (hypertrophy) in non-dividing cells (Guertin and Sabatini, 2006). Interestingly, TOR signaling has  
653 been implicated in the morphogenesis of KV (Casar Tena et al., 2015, DiBella et al., 2009, Yuan  
654 et al., 2012), but localized TOR activity has not been investigated. It will be interesting in future  
655 work to test for asymmetric expression/function of TOR pathway components in KV cells.

656

657         What makes KV-ant cells behave different from KV-post cells? This asymmetry likely  
658 results from a combination of intrinsic and extrinsic factors that differentially regulate KV-ant and  
659 KV-post cells. One possible intrinsic mechanism is that different KV cells develop different

660 mechanical properties. Our previous mathematical models suggest that differential cell-cell  
661 interfacial tensions along the AP axis can generate AP asymmetric cell shape changes in KV  
662 (Wang et al., 2012). Interestingly, a recent study in *Drosophila* showed that contractile force  
663 induced cell shape changes are instituted via cell volume reduction (Saias et al., 2015), which  
664 indicates a link between cell volume regulation and mechanical force generation. In the KV  
665 system, it will be interesting to test in future work whether AP asymmetric volume changes result  
666 in differential cytoskeletal contractility between KV-ant and KV-post cells. Another possible  
667 contributing factor to asymmetric KV cell size is differential activation of ion channels in KV-ant  
668 and KV-post cells. For example, it is known that the Cfr localizes to the apical surface of all KV  
669 cells at all stages of KV development (Navis and Bagnat, 2015). A recent study has uncovered  
670 mechanosensitive activation of Cfr in response to membrane stretch (Zhang et al., 2010).  
671 Stretching the plasma membrane increased ion conductance and also the probability of open  
672 Cfr channels at cell membranes. During KV remodeling, apical membrane stretch in KV-post  
673 cells may lead to increased Cfr activity and higher ion-efflux with a loss of volume in these cells  
674 (**Figure 7**). An alternative possibility is that different KV cell fates (e.g. KV-ant and KV-post  
675 cells) may be determined early in development. By tracking the DFCs that give rise to KV, we  
676 have found that these cells maintain their relative spatial positions throughout KV development  
677 (Dasgupta and Amack, 2016). This suggests subpopulations of KV cells may differentiate early  
678 in development and become biochemically distinct during KV morphogenesis. Additional studies  
679 are warranted to test the hypothesis of distinct KV-ant and KV-post subpopulations of cells that  
680 have differential gene expression and/or ion channel activity.

681

## 682 **The impact of mechanical forces on KV epithelial morphogenesis**

683 Our vertex model simulations suggest that asymmetric volume changes are not alone  
684 sufficient to fully induce KV cell shape changes. In addition to cell-intrinsic mechanisms,  
685 biophysical forces likely guide the formation of the KV epithelium. These mechanical forces can  
686 also arise from extrinsic sources that stem from the mechanical properties of surrounding  
687 tissues or extracellular matrix (ECM) (Campas et al., 2014, Chanet and Martin, 2014, Serwane  
688 et al., 2016, Etournay et al., 2015). Localized ECM deposition around anterior region of KV has  
689 been found to be important for asymmetric cell shape changes during KV morphogenesis  
690 (Compagnon et al., 2014). Interestingly, our simulations indicated that asymmetric cell shape  
691 changes are more pronounced when anterior external cells had solid-like properties and  
692 posterior external cells were fluid-like. An AP gradient of ECM may contribute to differential

693 mechanical properties surrounding KV. Other mechanisms, which remain unexplored, are  
694 mechanical forces generated by cells surrounding the KV as it advances towards the tailbud via  
695 convergent extension movements. Tissue fluidity in the tailbud plays an important role in  
696 controlling body elongation in zebrafish (Lawton et al., 2013) and may have an impact on KV.  
697 Our mathematical modeling suggests that solid-like behavior of surrounding tissue may play an  
698 important role in KV remodeling. In a previous study, we used DFC/KV specific knockdown of  
699 the Rho kinase Rock2b to test whether actomyosin contractility in KV cells vs. surrounding cells  
700 is involved in KV cell shape changes (Wang et al., 2012). KV cell shape changes failed to occur  
701 in embryos with Rock2b knocked down in KV cells, even though surrounding cells were normal,  
702 indicating that cell-autonomous actomyosin activity is important for KV cell shape changes.  
703 However, future studies are needed to explore how the mechanical properties of neighboring  
704 cells impact the establishment of asymmetric KV-ant and KV-post cell behaviors.

705

706 Lumen expansion occurs synchronously with changes in epithelial cell shapes during KV  
707 morphogenesis (Compagnon et al., 2014, Wang et al., 2012), which raises the possibility that  
708 contractile forces and/or intraluminal pressure contributes to KV cell shape changes. This idea  
709 is supported by the observation that blocking lumen expansion with ion channel inhibitors  
710 prevents KV shape changes (Compagnon et al., 2014 ). However, blocking ion channel activity  
711 also disrupts the previously unrecognized KV cell volume changes, making it unclear whether  
712 the lack of cell shape changes are due to reduced luminal forces or absence of cell volume  
713 changes. Our mathematical models suggest that KV cells can undergo asymmetric cell shape  
714 changes even in the absence of forces associated with lumenogenesis. This prediction was  
715 experimentally tested by perturbing KV cell-cell adhesions, which allowed us to block lumen  
716 expansion without altering ion channel activity or cell volume changes. 3D morphometric  
717 analyses of cell behaviors revealed that KV cells undergo normal cell shape changes in the  
718 absence of lumen expansion. These results provide new mechanistic insight into KV epithelial  
719 morphogenesis and suggest a working model in which asymmetric KV cell shape changes  
720 depend on intrinsic ion flux-mediated fluid movements and do not depend on extrinsic forces  
721 generated by lumen expansion.

722

723 We propose that luminal forces have a nominal impact on KV cell shape changes.  
724 Previous experimental results support this idea. First, KV cells can fail to change shape even  
725 when lumen expansion is normal. Inhibiting Rock2b function or non-muscle myosin II activity

726 had no effect on KV lumen expansion, but prevented cell shape changes during KV remodeling  
727 (Wang et al., 2011, Wang et al., 2012). This indicates that the mechanical forces generated  
728 during lumenogenesis are not sufficient to drive KV cell shape changes without active  
729 cytoskeletal contractility. Second, the degree of KV lumen expansion is highly variable in a  
730 population of wild-type embryos. Correlations between KV lumen size and KV function show  
731 that the lumen only needs to exceed a relatively low size threshold for the KV to be functional  
732 (Gokey et al., 2016). Thus, full expansion of the lumen is not required for effective KV activity.  
733 Together, these findings indicate that forces exerted by expansion of the lumen play a minor  
734 role in cell shape changes during KV epithelial morphogenesis.

735

### 736 **Programmed cell volume changes in epithelial morphogenesis**

737 Cell size is regulated by ion flux, but can also depend on progression through the cell  
738 cycle. Thus it is important to note that KV cells are post-mitotic epithelial cells that assemble a  
739 cilium (Amack et al., 2007). As discussed above, we consider the robust AP asymmetric  
740 changes in KV cell size that occurs with precise developmental timing (between 4 ss and 6 ss)  
741 as genetically 'programmed cell volume changes' that regulate KV organ architecture. In the  
742 zebrafish KV epithelium, we propose that programmed cell volume changes work in concert with  
743 other mechanisms to drive KV remodeling. Other recent studies have also identified links  
744 between cell volume changes and epithelial morphogenesis (Kolahi et al., 2009, Saias et al.,  
745 2015, Hoijman et al., 2015). However, little is known about the influence of cell volume changes  
746 on cell shape regulation. As mentioned previously, during zebrafish otic vesicle development  
747 epithelial cells become thinner, suggesting intraepithelial fluid movement contributes to both  
748 lumen growth and cell/tissue shape change (Hoijman et al., 2015). This finding is consistent with  
749 studies in cell culture systems (Braunstein et al., 2004, Vazquez et al., 2001) that have shown  
750 that epithelial cells indeed undergo cellular fluid loss to regulate cell volume and cell shape. In  
751 the mouse embryo, a group of nonproliferative epithelial cells in the tooth primordium also  
752 decrease their volume and become thinner during tooth budding morphogenesis (Ahtiainen et  
753 al., 2016). Another recent study in *Drosophila* uncovered that during dorsal closure cells within  
754 the amnioserosa lose their volume by ~30% and change their shape (Saias et al., 2015).  
755 Additionally, in the egg chamber of *Drosophila* the follicle cell epithelium undergoes volume  
756 changes during oocyte development to attain distinct cell shapes (Kolahi et al., 2009). Taken  
757 together with our experimental results and mathematical models in KV, these examples suggest

758 that programmed cell volume change might be a common mechanism that regulates cell shape  
759 during epithelial morphogenesis in several tissues and organs.

760

## 761 MATERIALS AND METHODS

762

### 763 Zebrafish husbandry and strains

764 Zebrafish strains were maintained using standard procedures. Wild-type TAB zebrafish were  
765 obtained from the Zebrafish International Resource Center. In addition, the following transgenic  
766 zebrafish lines were used: *Tg(ubi:Zebrawow)* (Pan et al., 2013), *Tg(sox17:GFP-CAAX)<sup>snv101</sup>* (this  
767 study), *Tg(actb2:myl12.1-MKATE2)<sup>snv102</sup>* (this study), *Tg(sox17:Cre<sup>ERT2</sup>)<sup>snv120</sup>* (this study).  
768 Embryos were staged as described (Kimmel et al., 1995).

769

### 770 Generation of transgenic lines

771 Transgene constructs were generated using the Gateway-based Tol2 kit (Kwan et al., 2007). To  
772 generate *Tg(sox17:Cre<sup>ERT2</sup>)* and *Tg(sox17:GFP-CAAX)* transgenics, gateway cloning was  
773 performed by combining p5E-*sox17* (a generous gift from Stephanie Woo) (Woo et al., 2012),  
774 pME-Cre-ERT2 or pME-GFP-CAAX (Tol2 Kit v2), p3E-SV40-polyA (Tol2 Kit v2), and pDest-  
775 Tol2CG4 (Tol2 Kit v2) plasmids and LR Clonase II Plus (Invitrogen). Verified constructs (25  
776 ng/μl plasmid DNA) were injected separately with Tol2 Transposase mRNA (~25 ng/μl) into one  
777 cell stage TAB zebrafish embryos to generate *Tg(sox17:Cre<sup>ERT2</sup>)<sup>snv120</sup>* or *Tg(sox17:GFP-  
778 CAAX)<sup>snv101</sup>* F<sub>0</sub> founders. Adult F<sub>0</sub> animals were then crossed with wild-type fish to generate F<sub>1</sub>  
779 heterozygotes. *Tg(sox17:Cre<sup>ERT2</sup>)<sup>snv120</sup>* fish were then crossed with homozygous  
780 *Tg(ubi:Zebrawow)* (Pan et al., 2013) animals to generate a double *Tg(sox17:Cre<sup>ERT2</sup>);  
781 Tg(ubi:Zebrawow)* transgenic strain. To generate a *Tg(actb2:myl12.1-MKATE2)* transgenic fish,  
782 p5E-*actb2* (Tol2 Kit v2), pME-*myl12.1-MKATE2* (see supplementary materials and methods),  
783 and p3E-SV40-polyA (Tol2 Kit v2) plasmids were recombined into pDestTol2CG4 destination  
784 vector as described above. Wild-type TAB embryos were injected with verified constructs and  
785 Tol2 Transposase mRNA to generate *Tg(actb2:myl12.1-MKATE2)<sup>snv102</sup>* F<sub>0</sub> fish. Adult  
786 *Tg(actb2:myl12.1-MKATE2)<sup>snv102</sup>* F<sub>0</sub> fish were crossed with wild-type TAB to generate F<sub>1</sub>  
787 heterozygotes. *Tg(actb2:myl12.1-MKATE2)* fish were crossed with homozygous *Tg(sox17:GFP-  
788 CAAX)* animals to generate a double *Tg(actb2:myl12.1-MKATE2); Tg(sox17:GFP-CAAX)*  
789 transgenic strain.

790



## 791 **Whole-mount in situ RNA hybridization**

792 A plasmid encoding full-length *jupa* was kindly provided by Maura Grealy's lab (NUI, Galway)  
793 (Martin et al., 2009). It was subcloned into a pCS2<sup>+</sup> vector and PCR amplified using following  
794 primers: *jupa*L- 5'-GGCTGGCCCTGTGTCCAGCC-3' and *jupa*R- 5'-  
795 GTAGCCATCAAGCTCTTCAT-3'. The amplicon was TA cloned into pCRII TOPO vector and  
796 used to generate sense and antisense mRNA probes (DIG RNA labeling kit, Sigma) to detect  
797 *jupa* expression by in situ hybridization. RNA in situ hybridizations were performed as described  
798 (Wang et al., 2011).

799

## 800 **Embryo injections**

801 Morpholino oligonucleotides (MOs) were obtained from Gene Tools, LLC. We designed *jupa*  
802 MO-1 (5'-TTATGATTGTGTCTTCTCACCTGCA-3') to interfere with *jupa* pre-mRNA splicing of  
803 exons 2 and 3. *jupa* MO-2 (5'-GAGCCTCTCCCATGTGCATTTCCAT-3') designed to block *jupa*  
804 mRNA translation was previously described (Martin et al., 2009). Other previously characterized  
805 MOs used in this study were *cfr* MO (5'-CACAGGTGATCTCTGCATCCTAAA-3') (Gokey et al.,  
806 2016), *lgl2* MO-1 (5'-GCCCATGACGCCTGAACCTCTTCAT-3') (Tay et al., 2013) and a  
807 standard negative control MO (5'-CCTCTTACCTCAGTTACAATTTATA-3') (Gene Tools). MOs  
808 were injected into wild-type TAB embryos between the 1- and 2-cell stages. Dose curves were  
809 performed to determine optimal MO treatments: 2.5 ng of *jupa* MO-1, 2.5 ng of *jupa* MO-2, 1 ng  
810 of *cfr* MO (Gokey et al., 2016), 4.4 ng of *lgl2* MO-1 (Tay et al., 2013) and 2.5 ng of control MO.  
811 All MOs were co-injected with 4 ng p53 MO (5'-GCGCCATTGCTTTGCAAGAATTG-3') to  
812 diminish off-target effects (Tay et al., 2013). To conduct rescue experiments, pCS2<sup>+</sup> vector  
813 containing full-length *jupa* was digested with NotI restriction enzyme and the linearized plasmid  
814 was used as a template to synthesize capped *jupa* mRNA using SP6 mMessage mMachine kit  
815 (Ambion). For *Jup* rescue experiments, *jupa* MO-1 was co-injected with 75 pg *jupa* mRNA. A  
816 construct that encodes a dominant negative JUP-naxos protein (Asimaki et al., 2014) was a kind  
817 gift from the Saffitz Lab. To over-express the JUP-naxos protein, 120 pg of *JUP-naxos* mRNA  
818 was injected into 1-cell stage TAB embryos.

819

820

## 821 **Fluorescent dextran injections into KV**

822 Control MO or *jupa* MO-1 treated *Tg(sox17:GFP-CAAX)* embryos were dechorionated and  
823 mounted in 1% low melting agarose at 6 ss. KV lumens were microinjected with ~1nL of 10 kDa

824 dextran, Alexa Fluor-568 (Molecular Probes; Lot: 1120095) at 6 ss and imaged using a Zeiss  
825 Imager M1 microscope immediately (at 6 ss). Successfully injected embryos were then  
826 incubated at 28.5 degrees for one hour and then imaged again at 8 ss.

827

### 828 **Immunofluorescence and microscopy**

829 For whole mount immunofluorescent staining experiments, embryos were fixed in 4%  
830 paraformaldehyde in 1X PBS with 0.5% Triton X-100 at 4°C overnight and then dechorionated in  
831 1X PBS. Embryos were permeabilized in blocking solution containing 1X PBS, 0.1% Triton X-  
832 100, 0.1%DMSO, and 5% goat serum for 4 hours. Primary antibodies were diluted in fresh  
833 blocking solution and incubated with embryos at 4°C overnight. Primary antibodies used: mouse  
834 anti-junction plakoglobin (1:200, BD Transduction Laboratories), mouse anti-ZO-1 (1:200,  
835 Invitrogen), mouse anti-E-cadherin (1:200, BD Transduction Laboratories), mouse anti-  
836 acetylated tubulin (1:200, Sigma) and rabbit anti-GFP (1:200, Molecular Probes). Embryos  
837 were then washed in 1X PBS with 0.1% Triton X-100, 0.1% DMSO, and 1% BSA at room  
838 temperature. AlexaFluor 488- and 568- conjugated anti-rabbit and anti-mouse secondary  
839 antibodies (Invitrogen, Molecular Probes) were used at 1:200 dilutions in blocking solution  
840 overnight. Stained embryos were then washed in 1X PBS with 0.1% Triton X-100, 0.1% DMSO,  
841 1% BSA at room temperature. Embryos were imaged using either Zeiss Imager M1 microscope  
842 or a Perkin-Elmer UltraVIEW Vox spinning disk confocal microscope. Quantification based on  
843 fluorescent immunostaining was performed using ImageJ software. KV lumen areas were  
844 measured using maximum projections of ZO-1 staining. E-cadherin levels at KV cell junctions  
845 were measured by determining the mean gray level (per pixel) along KV cell lateral membranes  
846 as described (Tay et al., 2013). This mean gray level (fluorescence intensity) was normalized to  
847 GFP intensity along lateral membranes of KV cells.

848

### 849 **Immunoblotting**

850 Protein extracts from approximately 30 zebrafish embryos at 8 ss were prepared as described  
851 (Martin et al., 2009). 30 µL of 2X SDS sample buffer was added and samples were boiled for 5  
852 min. Extract from approximately 10 embryos was loaded into each lane of commercially  
853 prepared 12% gels (Bio-Rad laboratories 456-1044) and ran at 100 V for 2 hrs. Semi-dry  
854 transfers were performed at 15 V for 45 min. onto a nitrocellulose membrane (Millipore  
855 HATF00010). Membranes were blocked in blocking solution (3% BSA, 100mM NaCl, 20mM Tris  
856 with pH 7.6, 0.2% Tween-20 in distilled water) over night at 4°C. Membranes were cut and anti-

857 Jup (BD Transduction Laboratories) and anti-alpha tubulin antibodies (Sigma T-6199) were  
858 used at 1:1000 dilutions in primary antibody block (0.3% BSA and tris-buffer saline with Tween-  
859 20 or TBST) and incubated at 4°C over night. Membranes were washed 4x15 min in TBST.  
860 Anti-mouse (Bio-Rad laboratories 166-2408) secondary antibodies were used at a 1:10,000  
861 dilution in TBST for 2 hrs at room temperature. After 4 washes for 15 min in TBST (10mM Tris  
862 with pH 8, 150mM NaCl, 0.05% Tween-20 in distilled water) membranes were incubated in ECL  
863 (Bio-Rad laboratories 170-5060) for 1 min and imaged on a ChemiDoc MP (Bio-Rad  
864 laboratories) imager. Band intensities were quantified using ImageJ software.

865

### 866 **Pharmacological treatments**

867 To induce low levels of Cre recombinase activity in *Tg(sox17:Cre<sup>ERT2</sup>; Tg(ubi:Zebrawow)* double  
868 transgenic embryos, these embryos were treated with a working concentration of 5µM 4-  
869 hydroxy tamoxifen (Sigma) in 0.1% DMSO from the dome stage to the shield stage. To inhibit  
870 ion channels, embryos were either treated with a working concentration of 1mM ouabain  
871 (Sigma) dissolved in water or 30µM CFTRinh-172 (Tocris, Catalog No. 3430) in 0.1% DMSO  
872 from the bud stage to 2 ss or 8 ss. To activate Cftr channels, control MO and *jupa* MO injected  
873 embryos were treated with a working concentration of 10 µM CFTRact-09 (Chem Bridge) from  
874 the bud stage to 8 ss. 0.1% DMSO was used as a vehicle control for all experiments. After  
875 pharmacological treatments, embryos were thoroughly washed with embryo medium, mounted  
876 in 1% low melting agarose and imaged using either a Perkin-Elmer UltraVIEW Vox spinning disk  
877 confocal microscope or a Zeiss Imager M1 microscope.

878

### 879 **Live imaging and morphometric analysis of KV cells**

880 To image live KV cells, embryos were dechorionated and mounted in 1% low-melting point  
881 agarose on a glass-bottom MetTek dish at specific stages. Time-lapse imaging of KV was  
882 performed using 2 µm step-scan captured at 5 min. intervals for 105 min. using a Perkin-Elmer  
883 UltraVIEW Vox spinning disk confocal microscope. The acquired 3D datasets were processed  
884 and volume rendered using surface evolver tool in Imaris (Bitplane). Imaris was used to  
885 measure the length, width and height of reconstructed KV cells. The surface of the lumen was  
886 used to establish the axes of KV cells such that lateral axis (cell width) is parallel to the tangent  
887 of the curved lumen surface. To measure KV-lumen, KV-ant and KV-post cell cross-sectional  
888 areas, captured 3D images were oriented and maximum cross-sectional area from the middle

889 plane perpendicular to the DV axis of individual cells were measured using clipping plane  
890 function in Imaris (Bitplane).

891

### 892 **KV cell volume measurements**

893 Single mosaic labeled cells (YFP<sup>+</sup>) in the KV were 3D reconstructed using ‘Create Surface’ tool  
894 in Imaris (BITPlane) software. From 3D reconstructed cells the ‘cell volume’ was measured. To  
895 measure total KV cellular volume, double transgenic *Tg(actb2:myl12.1mKATE2);*  
896 *Tg(sox17:GFP-CAAX)* embryos were used to 3D reconstruct the KV lumen and the total KV  
897 cellular component. The 3D lumen was split into equal anterior and posterior halves and the  
898 cellular component associated with the two halves of the lumen were defined as the ‘total KV-  
899 ant cellular volume’ and ‘total KV-post cellular volume.’

900

### 901 **Analysis of cells external to the KV**

902 55 pg of mRNA encoding a membrane-targeted mCherry (*mCherry-CAAX*) was injected into  
903 *Tg(sox17:GFP-CAAX)* embryos at the 1-cell stage. Confocal images were captured from live  
904 embryos at 2 ss and 8 ss. The cell shape index,  $q = [(cell\ cross\ sectional\ perimeter)/\sqrt{(cell}$   
905  $cross\ sectional\ area)}]$  (Bi et al., 2016) was used to define morphology of cells surrounding KV at  
906 the middle plane of the KV organ in control and ouabain treated embryos at 2 ss and 8 ss. On  
907 average, 5 cells were measured from the anterior and posterior regions per embryo.

908

### 909 **Statistics**

910 The significance of pairwise differences between groups of biological data was computed by  
911 Student’s two-tailed t-tests with two-tailed distribution and two-sample unequal variance.

912

## 913 **SUPPLEMENTARY MATERIALS AND METHODS**

914

### 915 **Vertex Model simulation of KV**

916 We simulate KV morphogenesis using the Vertex Model with periodic boundary conditions (Bi et  
917 al., 2015, Farhadifar et al., 2007, Fletcher et al., 2014, Hufnagel et al., 2007). Because fully 3D  
918 models introduce a larger number of variables and parameters, we choose a two-dimensional  
919 description where each cell  $i$  is represented as a polygon with area  $A_i$  and perimeter  $P_i$ . We  
920 focus our description on the plane through the center of the KV perpendicular to the dorso-

921 ventral axis, and represent lumen, KV-ant cells, KV-post cells, and cells external to the KV as  
922 different cell types, which may differ in their mechanical properties. We choose to have an  
923 equal number  $N$  of KV-ant and KV-post cells, respectively, and 100 external cells. Force-  
924 balanced states are defined by minima of the following effective energy functional

$$925 \quad E = \frac{1}{2} \sum_i [K_A (A_i - A_0)^2 + K_P P_i^2] + \sum_{\langle ij \rangle, i < j} \Lambda_{ij} l_{ij}. \quad (1)$$

926 Here, the first sum is over all cells. The first term in it describes a cell area elasticity, where  $K_A$   
927 is the associated spring constant and  $A_0$  is the preferred area. The second term in the first sum  
928 describes cell perimeter elasticity, where  $K_P$  is the associated spring constant. The second sum  
929 in Eq. (1) is over all interfaces  $\langle ij \rangle$  between adjacent cells  $i$  and  $j$ . It accounts for the interfacial  
930 tensions between cells, where  $\Lambda_{ij}$  denotes the interfacial tension between cells  $i$  and  $j$  and  $l_{ij}$   
931 denotes the interface length. Note that in order to facilitate comparison with experimental data,  
932 we choose micrometers as length units for our vertex model simulations.

933 For our simulations, we choose the values of  $A_0$  displayed in **Figure 4 – supplement**  
934 **table 2**. The listed values for lumen and KV cells are experimentally measured average cross-  
935 sectional areas (see separate supplement section). We assumed the external cells to be about  
936 as big as the KV cells, so we set the value of the external cells at 2 ss to the average of KV-ant  
937 and KV-post cells. The total preferred area is computed as the total sum of the preferred areas  
938  $A_0$  of all cells at 2 ss. The preferred area of the external cells at 8 ss is chosen such that the  
939 total preferred area stays constant between 2 ss and 8 ss, which corresponds to only a small  
940 preferred area change of these cells (**Figure 4 – supplement table 2**). We set  $K_A = 1000$  and  
941  $K_P = 1$  for all cell types. We have chosen a very high ratio  $(K_A L^2)/K_P$  with  $L$  being a typical cell  
942 diameter in order to ensure that the measured cross-sectional area values in **Figure 4 –**  
943 **supplement table 2** are largely fulfilled by the cells.

944 The values for the line tensions depend on both involved cell types. We have set the  
945 line tension between any two KV cells  $i$  and  $j$  to the same value  $\Lambda_{ij} = \Lambda^{\text{KV-KV}}$ , independent of  
946 whether the KV cells are anterior or posterior cells. Similarly, the line tension between two  
947 external cells  $i$  and  $j$  is set to  $\Lambda_{ij} = \Lambda^{\text{ext-ext}}$ . Since we have no measured values for these  
948 interfacial tensions, we vary both interfacial tension parameters,  $\Lambda^{\text{KV-KV}}$  and  $\Lambda^{\text{ext-ext}}$ , in **Figure**  
949 **4, Figure 4-figure supplement 2,3**. The interfacial tension between a KV cell  $i$  and an external  
950 cell  $j$  is set to the average of both homotypic interfacial tensions with an additional offset:

951  $\Lambda_{ij} = \Lambda^{KV-ext} = (\Lambda^{KV-KV} + \Lambda^{ext-ext})/2 + 200$ . The tension offset serves to prevent KV cells from  
952 being extruded from the KV epithelium and to allow for a smoother basal interface between KV  
953 and external cells. Between KV cells and lumen, the interfacial tension is set to a positive value  
954 of  $\Lambda_{ij}^{lumen-KV} = 100$  to ensure that the lumen surface is roughly spherical.

955       The system is initialized using the Voronoi tessellation of a pattern of cell positions. The  
956  $2N$  KV cell positions are arranged equidistantly on a circle around the central lumen “cell”  
957 position. The radius of this circle is computed as the estimated lumen radius plus half of the  
958 estimated KV cell height. The positions for the 100 external cells are drawn randomly from a  
959 uniform distribution with the condition of having at least a distance of lumen radius plus  
960 estimated KV cell height from the lumen cell position. Then, preferred cell areas are set to their  
961 2 ss values and the system is relaxed by minimizing the energy functional. Afterwards, the  
962 preferred areas are set to their respective 8 ss values and the system is relaxed again. Note  
963 that the Voronoi tessellation is only used to facilitate the initialization. The subsequent energy  
964 minimizations are carried out using varying vertex positions. Also note that the dimensions of  
965 the periodic box were also allowed to vary during the minimizations. We use the conjugated  
966 gradient algorithm from the GSL library (<https://www.gnu.org/software/gsl/>) for the energy  
967 minimization (Press, 2007).

968

#### 969 **Computation of the KV cell length-width ratio (LWR) in the simulations**

970 We compute the LWR of a given KV cell as the quotient of its length  $L$  divided by its width  $W$   
971 (**Figure 4-figure supplement 1**). We define the width  $W$  as the distance between the midpoints  
972 of the respective interfaces with the two adjacent KV cells. The length  $L$  is defined as the  
973 distance from the midpoint of the interface with the lumen to the midpoint between points  $P$  and  
974  $Q$ , which are the respective endpoints of the interfaces with the adjacent KV cells. In **Figure 4E-**  
975 **F** we plot the respective average LWR. During the energy minimizations, KV cells occasionally  
976 lose contact with the lumen. For the averaging, we thus only take into account the KV cells that  
977 are in still contact with the lumen.

978

979

980

## 981 Definition of separation of solid from fluid regimes

982 Earlier work on the vertex model suggested that a shape index computed from cell perimeter  
983 and area can be used to differentiate between solid and fluid regime (Bi et al., 2015). However,  
984 these simulations only studied vertex model tissues with a single cell type randomly arranged,  
985 while in our simulations, there are several cell types and a very distinct geometrical  
986 arrangement. Thus, to differentiate solid cell from fluid ones, we choose a different  
987 measurement, which is based on the actual cell perimeter  $P_i$  and the interfacial tensions  $\Lambda$ .  
988 Based on the interfacial tensions, one can define another parameter, which characterizes a  
989 preferred perimeter  $P_0 = -\Lambda/(2K_p)$ . It has been observed that fluidity also correlates with the  
990 difference between actual and preferred perimeter  $P_i - P_0$  (Bi et al., 2015). Solid vertex model  
991 tissues have  $P_i - P_0 > 0$  while fluid vertex model tissue has  $P_i - P_0 = 0$ . Correspondingly, we  
992 use this criterion to differentiate between solid and fluid cells to define the positions of the  
993 dashed black lines in **Figure 4E,F** and in **Figure 4 – figure supplements 2E,F and , Figure 4 –**  
994 **figure supplements 3E,F**. Note that as a consequence, the positions of these lines slightly  
995 vary for different conditions.

996

## 997 Case of solid anterior and fluid posterior KV cells

998 In our vertex model we have discovered a second mechanism that can lead to a positive APA  
999 for small  $N$ , which is different from the mechanism illustrated in **Figure 4G**. This mechanism is  
1000 at work for instance in the hatched region in **Figure 4-figure supplement 2E**, where anterior  
1001 KV cells are solid-like and posterior KV cells are fluid-like. This difference arises even though  
1002 both anterior and posterior KV cells have the same interfacial tension  $\Lambda^{KV-KV}$ , because anterior  
1003 KV cells have a much higher preferred area at 8ss than posterior KV cells (**Figure 4-**  
1004 **supplement table 2**). Because the condition of fluidity in the vertex model depends on both  
1005 preferred area and interfacial tension ((Bi et al., 2015), there is an intermediate regime when  
1006 increasing  $\Lambda^{KV-KV}$  where anterior KV cells are already solid, but posterior KV cells are still fluid.  
1007 When the lumen area increases in this regime, both anterior and posterior cells together have to  
1008 accommodate a larger total apical interface with the lumen. However, because the anterior cells  
1009 are solid while the posterior cells are fluid, the latter are more easily stretched laterally. This  
1010 induces an asymmetry in cell shape that corresponds to a positive APA. Note that the effect of  
1011 this mechanism appears to extend further into the region where also the posterior KV cells are

1012 solid, likely because close to the hatched region they are still more easily deformable than the  
1013 anterior KV cells.

1014

#### 1015 **Simulations with asymmetric properties of the external cells**

1016 To simulate asymmetric properties of external cells (see **Figure 4 – figure supplement 4**), we  
1017 proceeded as before with the following changes. We divide all external cells into an anterior  
1018 and a posterior subset based on the randomly drawn initial Voronoi cell positions. If the initial  
1019 Voronoi position of a cell is anterior (posterior) of the initial lumen Voronoi position, we regard it  
1020 as one of the anterior (posterior) external cells. The interfacial tensions between two anterior  
1021 (posterior) external cells are defined by the parameter  $\Lambda^{\text{ext,A-ext,A}}$  ( $\Lambda^{\text{ext,P-ext,P}}$ ). To set the  
1022 anterior cells solid (fluid) and the posterior cells fluid (solid), we choose the parameter values  
1023  $\Lambda^{\text{ext,A-ext,A}} = 150$  and  $\Lambda^{\text{ext,P-ext,P}} = -120$  ( $\Lambda^{\text{ext,A-ext,A}} = -120$  and  $\Lambda^{\text{ext,P-ext,P}} = 150$ ). The  
1024 interfacial tension between an anterior and a posterior external cell was set to the average:  
1025  $\Lambda^{\text{ext,A-ext,P}} = (\Lambda^{\text{ext,A-ext,A}} + \Lambda^{\text{ext,P-ext,P}})/2$ .

1026

#### 1027 **Percentage cell volume, cell cross-sectional area and cell height change quantifications**

1028

1029 Percentage changes were measured using the following method: If we consider, cellular  
1030 properties at 8 ss = y with standard deviation  $\delta y$  and cellular properties at 2 ss = x with standard  
1031 deviation  $\delta x$ , then ‘% change (z)’ =  $\{(y - x)/x\} * 100$ . The standard deviations can be used as the  
1032 uncertainty in the measured values. Thus, the uncertainty  $\delta z$  in z can be represented as:

$$\delta z = \frac{100}{x} \left[ \delta y^2 + \delta x^2 \left( \frac{y}{x} \right)^2 \right]^{1/2}$$

1033

#### 1034 **Generation of pME-myI12.1-MKATE2 construct**

1035 The myI12.1 ORF was PCR amplified from cDNA pool generated from 8 ss zebrafish embryos  
1036 using following primers:

1037 myI12.1F: 5'-ATTAATGGATCCATGTCTGA GCAAACGCGC CAA-3'

1038 myI12.1R: 5'-ATTAATGAATTCTGCATCGTCTTTGTCTTTGGCTC-3'



1039 The PCR amplified myl12.1 ORF was sub-cloned into pCS2<sup>+</sup>MKATE2 vector using BamH1 and  
1040 EcoR1 restriction enzymes to construct pCS2<sup>+</sup> myl12.1-MKATE2 plasmid.

1041 The myl12.1-MKATE2 construct was PCR amplified from pCS2<sup>+</sup> myl12.1-MKATE2 plasmid  
1042 using following primers:

1043 attB1: 5'-GGGGACAAGTTTGTACAAAAAAGCAGGCTATGTCTCGAGCAAACGCGCCAA-3'

1044 attB2: 5'-GGGGACCACTTTGTACAAGAAAGCTGGGTTCATCTGTGCCCCAGTTT-3'

1045

1046 The PCR amplified myl12.1-MKATE2 construct was then cloned into pDONR221 vector using  
1047 BP recombination to generate the middle entry pME-myl12.1-MKATE2 vector.

1048

#### 1049 **ACKNOWLEDGEMENT**

1050 We thank Jeffrey Saffitz, Stephanie Woo and Maura Grealy for sharing reagents. We also thank  
1051 members of the Amack and Manning groups for helpful discussions and Madeline Clark and  
1052 Gonca Erdemci-Tandogan for providing critical feedback on the manuscript. A special thank you  
1053 to Fiona Foley and Sharleen Buel for outstanding technical support. This work was supported by  
1054 NIH grants R01HL095690 (JDA) and R01GM117598 (MLM). Additional support was provided by  
1055 a grant from the Simons Foundation (#446222 MLM and MM), the Research Corporation for  
1056 Scientific Advancement through the Cottrell Scholars Program (MLM and MM), and through the  
1057 Gordon and Betty Moore Foundation (MLM and MM). Computing infrastructure support was  
1058 provided through NSF ACI-1541396.

1059

#### 1060 **COMPETING INTERESTS**

1061 The authors declare no competing financial and non-financial interests.

1062

#### 1063 **REFERENCES**

1064

1065 AHTIAINEN, L., USKI, I., THESLEFF, I. & MIKKOLA, M. L. 2016. Early epithelial signaling  
1066 center governs tooth budding morphogenesis. *J Cell Biol*, 214, 753-67.

1067 ALVERS, A. L., RYAN, S., SCHERZ, P. J., HUISKEN, J. & BAGNAT, M. 2014. Single  
1068 continuous lumen formation in the zebrafish gut is mediated by smoothed-dependent  
1069 tissue remodeling. *Development*, 141, 1110-9.

1070 AMACK, J. D., WANG, X. & YOST, H. J. 2007. Two T-box genes play independent and  
1071 cooperative roles to regulate morphogenesis of ciliated Kupffer's vesicle in zebrafish.  
1072 *Dev Biol*, 310, 196-210.

1073 AMACK, J. D. & YOST, H. J. 2004. The T box transcription factor no tail in ciliated cells controls  
1074 zebrafish left-right asymmetry. *Curr Biol*, 14, 685-90.

- 1075 ASIMAKI, A., KAPOOR, S., PLOVIE, E., KARIN ARNDT, A., ADAMS, E., LIU, Z., JAMES, C. A.,  
1076 JUDGE, D. P., CALKINS, H., CHURKO, J., WU, J. C., MACRAE, C. A., KLEBER, A. G.  
1077 & SAFFITZ, J. E. 2014. Identification of a new modulator of the intercalated disc in a  
1078 zebrafish model of arrhythmogenic cardiomyopathy. *Sci Transl Med*, 6, 240ra74.
- 1079 BAGNAT, M., NAVIS, A., HERBSTREITH, S., BRAND-ARZAMENDI, K., CURADO, S.,  
1080 GABRIEL, S., MOSTOV, K., HUISKEN, J. & STAINIER, D. Y. 2010. Cse1l is a negative  
1081 regulator of CFTR-dependent fluid secretion. *Curr Biol*, 20, 1840-5.
- 1082 BARRETT, K. E. & KEELY, S. J. 2000. Chloride secretion by the intestinal epithelium: molecular  
1083 basis and regulatory aspects. *Annu Rev Physiol*, 62, 535-72.
- 1084 BI, D., LOPEZ, J. H., SCHWARZ, J. M. & MANNING, M. L. 2014. Energy barriers and cell  
1085 migration in densely packed tissues. *Soft Matter*, 10, 1885-90.
- 1086 BI, D., LOPEZ, J. H., SCHWARZ, J. M. & MANNING, M. L. 2015. A density-independent rigidity  
1087 transition in biological tissues. *Nature Physics*, 11, 1074-1079.
- 1088 BI, D., YANG, X., MARCHETTI, M. C. & MANNING, M. L. 2016. Motility-Driven Glass and  
1089 Jamming Transitions in Biological Tissues. *Physical Review X*, 6.
- 1090 BRAUNSTEIN, G. M., ZSEMBERY, A., TUCKER, T. A. & SCHWIEBERT, E. M. 2004.  
1091 Purinergic signaling underlies CFTR control of human airway epithelial cell volume. *J*  
1092 *Cyst Fibros*, 3, 99-117.
- 1093 CAMPAS, O., MAMMOTO, T., HASSO, S., SPERLING, R. A., O'CONNELL, D., BISCHOF, A.  
1094 G., MAAS, R., WEITZ, D. A., MAHADEVAN, L. & INGBER, D. E. 2014. Quantifying cell-  
1095 generated mechanical forces within living embryonic tissues. *Nat Methods*, 11, 183-9.
- 1096 CASAR TENA, T., BURKHALTER, M. D. & PHILIPP, M. 2015. Left-right asymmetry in the light  
1097 of TOR: An update on what we know so far. *Biol Cell*, 107, 306-18.
- 1098 CHANET, S. & MARTIN, A. C. 2014. Mechanical force sensing in tissues. *Prog Mol Biol Transl*  
1099 *Sci*, 126, 317-52.
- 1100 COMPAGNON, J., BARONE, V., RAJSHEKAR, S., KOTTMEIER, R., PRANJIC-FERSCHA, K.,  
1101 BEHRNDT, M. & HEISENBERG, C. P. 2014. The notochord breaks bilateral symmetry  
1102 by controlling cell shapes in the zebrafish laterality organ. *Dev Cell*, 31, 774-83.
- 1103 COOPER, M. S. & D'AMICO, L. A. 1996. A cluster of noninvoluting endocytic cells at the margin  
1104 of the zebrafish blastoderm marks the site of embryonic shield formation. *Dev Biol*, 180,  
1105 184-98.
- 1106 DAMKIER, H. H., BROWN, P. D. & PRAETORIUS, J. 2013. Cerebrospinal fluid secretion by the  
1107 choroid plexus. *Physiol Rev*, 93, 1847-92.
- 1108 DASGUPTA, A. & AMACK, J. D. 2016. Cilia in vertebrate left-right patterning. *Philos Trans R*  
1109 *Soc Lond B Biol Sci*, 371.
- 1110 DIBELLA, L. M., PARK, A. & SUN, Z. 2009. Zebrafish Tsc1 reveals functional interactions  
1111 between the cilium and the TOR pathway. *Hum Mol Genet*, 18, 595-606.
- 1112 ESCUDERO, L. M., BISCHOFF, M. & FREEMAN, M. 2007. Myosin II regulates complex cellular  
1113 arrangement and epithelial architecture in *Drosophila*. *Dev Cell*, 13, 717-29.
- 1114 ESSNER, J. J., AMACK, J. D., NYHOLM, M. K., HARRIS, E. B. & YOST, H. J. 2005. Kupffer's  
1115 vesicle is a ciliated organ of asymmetry in the zebrafish embryo that initiates left-right  
1116 development of the brain, heart and gut. *Development*, 132, 1247-60.
- 1117 ETOURNAY, R., POPOVIC, M., MERKEL, M., NANDI, A., BLASSE, C., AIGOUY, B., BRANDL,  
1118 H., MYERS, G., SALBREUX, G., JULICHER, F. & EATON, S. 2015. Interplay of cell  
1119 dynamics and epithelial tension during morphogenesis of the *Drosophila* pupal wing.  
1120 *Elife*, 4, e07090.
- 1121 FANG, W. K., LIAO, L. D., GU, W., CHEN, B., WU, Z. Y., WU, J. Y., SHEN, J., XU, L. Y. & LI, E.  
1122 M. 2014. Down-regulated gamma-catenin expression is associated with tumor  
1123 aggressiveness in esophageal cancer. *World J Gastroenterol*, 20, 5839-48.

- 1124 FARHADIFAR, R., ROPER, J. C., AIGOUY, B., EATON, S. & JULICHER, F. 2007. The  
1125 influence of cell mechanics, cell-cell interactions, and proliferation on epithelial packing.  
1126 *Curr Biol*, 17, 2095-104.
- 1127 FEIL, R., WAGNER, J., METZGER, D. & CHAMBON, P. 1997. Regulation of Cre recombinase  
1128 activity by mutated estrogen receptor ligand-binding domains. *Biochem Biophys Res*  
1129 *Commun*, 237, 752-7.
- 1130 FERNANDEZ-GONZALEZ, R., SIMOES SDE, M., ROPER, J. C., EATON, S. & ZALLEN, J. A.  
1131 2009. Myosin II dynamics are regulated by tension in intercalating cells. *Dev Cell*, 17,  
1132 736-43.
- 1133 FLETCHER, A. G., OSTERFIELD, M., BAKER, R. E. & SHVARTSMAN, S. Y. 2014. Vertex  
1134 models of epithelial morphogenesis. *Biophys J*, 106, 2291-304.
- 1135 FRIZZELL, R. A. 1995. Functions of the cystic fibrosis transmembrane conductance regulator  
1136 protein. *Am J Respir Crit Care Med*, 151, S54-8.
- 1137 FRIZZELL, R. A. & HANRAHAN, J. W. 2012. Physiology of epithelial chloride and fluid  
1138 secretion. *Cold Spring Harb Perspect Med*, 2, a009563.
- 1139 FUKUNAGA, Y., LIU, H., SHIMIZU, M., KOMIYA, S., KAWASUJI, M. & NAGAFUCHI, A. 2005.  
1140 Defining the roles of beta-catenin and plakoglobin in cell-cell adhesion: isolation of beta-  
1141 catenin/plakoglobin-deficient F9 cells. *Cell Struct Funct*, 30, 25-34.
- 1142 FUSS, B., JOSTEN, F., FEIX, M. & HOCH, M. 2004. Cell movements controlled by the Notch  
1143 signalling cascade during foregut development in *Drosophila*. *Development*, 131, 1587-  
1144 95.
- 1145 GIN, E., CRAMPIN, E. J., BROWN, D. A., SHUTTLEWORTH, T. J., YULE, D. I. & SNEYD, J.  
1146 2007. A mathematical model of fluid secretion from a parotid acinar cell. *J Theor Biol*,  
1147 248, 64-80.
- 1148 GOKEY, J. J., JI, Y., TAY, H. G., LITTS, B. & AMACK, J. D. 2016. Kupffer's vesicle size  
1149 threshold for robust left-right patterning of the zebrafish embryo. *Dev Dyn*, 245, 22-33.
- 1150 GUERTIN, D. A. & SABATINI, D. M. 2006. Cell Size Control.
- 1151 HOIJMAN, E., RUBBINI, D., COLOMBELLI, J. & ALSINA, B. 2015. Mitotic cell rounding and  
1152 epithelial thinning regulate lumen growth and shape. *Nat Commun*, 6, 7355.
- 1153 HOLEN, I., WHITWORTH, J., NUTTER, F., EVANS, A., BROWN, H. K., LEFLEY, D. V.,  
1154 BARBARIC, I., JONES, M. & OTTEWELL, P. D. 2012. Loss of plakoglobin promotes  
1155 decreased cell-cell contact, increased invasion, and breast cancer cell dissemination in  
1156 vivo. *Breast Cancer Res*, 14, R86.
- 1157 HUFNAGEL, L., TELEMAN, A. A., ROUAULT, H., COHEN, S. M. & SHRAIMAN, B. I. 2007. On  
1158 the mechanism of wing size determination in fly development. *Proc Natl Acad Sci U S A*,  
1159 104, 3835-40.
- 1160 KANE, D. A., MCFARLAND, K. N. & WARGA, R. M. 2005. Mutations in half baked/E-cadherin  
1161 block cell behaviors that are necessary for teleost epiboly. *Development*, 132, 1105-16.
- 1162 KIMMEL, C. B., BALLARD, W. W., KIMMEL, S. R., ULLMANN, B. & SCHILLING, T. F. 1995.  
1163 Stages of embryonic development of the zebrafish. *Dev Dyn*, 203, 253-310.
- 1164 KOLAH, K. S., WHITE, P. F., SHRETER, D. M., CLASSEN, A. K., BILDER, D. & MOFRAD, M.  
1165 R. 2009. Quantitative analysis of epithelial morphogenesis in *Drosophila* oogenesis: New  
1166 insights based on morphometric analysis and mechanical modeling. *Dev Biol*, 331, 129-  
1167 39.
- 1168 KOWALCZYK, A. P., NAVARRO, P., DEJANA, E., BORNSLAEGER, E. A., GREEN, K. J.,  
1169 KOPP, D. S. & BORGWARDT, J. E. 1998. VE-cadherin and desmoplakin are assembled  
1170 into dermal microvascular endothelial intercellular junctions: a pivotal role for plakoglobin  
1171 in the recruitment of desmoplakin to intercellular junctions. *J Cell Sci*, 111 ( Pt 20), 3045-  
1172 57.

- 1173 KRAMER-ZUCKER, A. G., OLALE, F., HAYCRAFT, C. J., YODER, B. K., SCHIER, A. F. &  
1174 DRUMMOND, I. A. 2005. Cilia-driven fluid flow in the zebrafish pronephros, brain and  
1175 Kupffer's vesicle is required for normal organogenesis. *Development*, 132, 1907-21.
- 1176 KWAN, K. M., FUJIMOTO, E., GRABHER, C., MANGUM, B. D., HARDY, M. E., CAMPBELL, D.  
1177 S., PARANT, J. M., YOST, H. J., KANKI, J. P. & CHIEN, C. B. 2007. The Tol2kit: a  
1178 multisite gateway-based construction kit for Tol2 transposon transgenesis constructs.  
1179 *Dev Dyn*, 236, 3088-99.
- 1180 LAWTON, A. K., NANDI, A., STULBERG, M. J., DRAY, N., SNEDDON, M. W., PONTIUS, W.,  
1181 EMONET, T. & HOLLEY, S. A. 2013. Regulated tissue fluidity steers zebrafish body  
1182 elongation. *Development*, 140, 573-82.
- 1183 LEONARD, M., CHAN, Y. & MENKO, A. S. 2008. Identification of a novel intermediate filament-  
1184 linked N-cadherin/gamma-catenin complex involved in the establishment of the  
1185 cytoarchitecture of differentiated lens fiber cells. *Dev Biol*, 319, 298-308.
- 1186 LEWIS, J. E., WAHL, J. K., 3RD, SASS, K. M., JENSEN, P. J., JOHNSON, K. R. &  
1187 WHEELLOCK, M. J. 1997. Cross-talk between adherens junctions and desmosomes  
1188 depends on plakoglobin. *J Cell Biol*, 136, 919-34.
- 1189 LUU, O., DAVID, R., NINOMIYA, H. & WINKLBAUER, R. 2011. Large-scale mechanical  
1190 properties of *Xenopus* embryonic epithelium. *Proc Natl Acad Sci U S A*, 108, 4000-5.
- 1191 MARTIN, E. D., MORIARTY, M. A., BYRNES, L. & GREALY, M. 2009. Plakoglobin has both  
1192 structural and signalling roles in zebrafish development. *Dev Biol*, 327, 83-96.
- 1193 MATSUI, T., THITAMADEE, S., MURATA, T., KAKINUMA, H., NABETANI, T., HIRABAYASHI,  
1194 Y., HIRATE, Y., OKAMOTO, H. & BESSHO, Y. 2011. Canopy1, a positive feedback  
1195 regulator of FGF signaling, controls progenitor cell clustering during Kupffer's vesicle  
1196 organogenesis. *Proc Natl Acad Sci U S A*, 108, 9881-6.
- 1197 MCKOY, G., PROTONOTARIOS, N., CROSBY, A., TSATSOPOULOU, A., ANASTASAKIS, A.,  
1198 COONAR, A., NORMAN, M., BABOONIAN, C., JEFFERY, S. & MCKENNA, W. J. 2000.  
1199 Identification of a deletion in plakoglobin in arrhythmogenic right ventricular  
1200 cardiomyopathy with palmoplantar keratoderma and woolly hair (Naxos disease).  
1201 *Lancet*, 355, 2119-24.
- 1202 MELBY, A. E., WARGA, R. M. & KIMMEL, C. B. 1996. Specification of cell fates at the dorsal  
1203 margin of the zebrafish gastrula. *Development*, 122, 2225-37.
- 1204 MERKEL, M. & MANNING, L. 2017. A geometrically controlled rigidity transition in a model for  
1205 confluent 3D tissues. *ArXiv e-prints* [Online], 1706. Available:  
1206 <http://adsabs.harvard.edu/abs/2017arXiv170602656M> [Accessed June 1, 2017].
- 1207 NAVIS, A. & BAGNAT, M. 2015. Developing pressures: fluid forces driving morphogenesis. *Curr*  
1208 *Opin Genet Dev*, 32, 24-30.
- 1209 NAVIS, A., MARJORAM, L. & BAGNAT, M. 2013. Cfr controls lumen expansion and function of  
1210 Kupffer's vesicle in zebrafish. *Development*, 140, 1703-12.
- 1211 NAVIS, A. & NELSON, C. M. 2016. Pulling together: Tissue-generated forces that drive lumen  
1212 morphogenesis. *Semin Cell Dev Biol*, 55, 139-47.
- 1213 NOTTEBAUM, A. F., CAGNA, G., WINDERLICH, M., GAMP, A. C., LINNEPE, R.,  
1214 POLASCHEGG, C., FILIPPOVA, K., LYCK, R., ENGELHARDT, B., KAMENYEVA, O.,  
1215 BIXEL, M. G., BUTZ, S. & VESTWEBER, D. 2008. VE-PTP maintains the endothelial  
1216 barrier via plakoglobin and becomes dissociated from VE-cadherin by leukocytes and by  
1217 VEGF. *J Exp Med*, 205, 2929-45.
- 1218 OATES, A. C., MORELLI, L. G. & ARES, S. 2012. Patterning embryos with oscillations:  
1219 structure, function and dynamics of the vertebrate segmentation clock. *Development*,  
1220 139, 625-39.

- 1221 OTEIZA, P., KOPPEN, M., CONCHA, M. L. & HEISENBERG, C. P. 2008. Origin and shaping of  
1222 the laterality organ in zebrafish. *Development*, 135, 2807-13.
- 1223 PAN, Y. A., FREUNDLICH, T., WEISSMAN, T. A., SCHOPPIK, D., WANG, X. C., ZIMMERMAN,  
1224 S., CIRUNA, B., SANES, J. R., LICHTMAN, J. W. & SCHIER, A. F. 2013. Zebrawow:  
1225 multispectral cell labeling for cell tracing and lineage analysis in zebrafish. *Development*,  
1226 140, 2835-46.
- 1227 PARK, J.-A., KIM, J. H., BI, D., MITCHEL, J. A., QAZVINI, N. T., TANTISIRA, K., PARK, C. Y.,  
1228 MCGILL, M., KIM, S.-H., GWEON, B., NOTBOHM, J., STEWARD JR, R., BURGER, S.,  
1229 RANDELL, S. H., KHO, A. T., TAMBE, D. T., HARDIN, C., SHORE, S. A., ISRAEL, E.,  
1230 WEITZ, D. A., TSCHUMPERLIN, D. J., HENSKKE, ELIZABETH P., WEISS, S. T.,  
1231 MANNING, M. L., BUTLER, J. P., DRAZEN, J. M. & FREDBERG, J. J. 2015. Unjamming  
1232 and cell shape in the asthmatic airway epithelium. *Nature Materials*, 14, 1040-1048.
- 1233 PRESS, W. H. 2007. *Numerical recipes : the art of scientific computing*, Cambridge, UK ; New  
1234 York, Cambridge University Press.
- 1235 QUINTIN, S., GALLY, C. & LABOUESSE, M. 2008. Epithelial morphogenesis in embryos:  
1236 asymmetries, motors and brakes. *Trends Genet*, 24, 221-30.
- 1237 ROXO-ROSA, M., JACINTO, R., SAMPAIO, P. & LOPES, S. S. 2015. The zebrafish Kupffer's  
1238 vesicle as a model system for the molecular mechanisms by which the lack of  
1239 Polycystin-2 leads to stimulation of CFTR. *Biol Open*, 4, 1356-66.
- 1240 SAIAS, L., SWOGER, J., D'ANGELO, A., HAYES, P., COLOMBELLI, J., SHARPE, J.,  
1241 SALBREUX, G. & SOLON, J. 2015. Decrease in Cell Volume Generates Contractile  
1242 Forces Driving Dorsal Closure. *Dev Cell*, 33, 611-21.
- 1243 SAKAGUCHI, T., KIKUCHI, Y., KUROIWA, A., TAKEDA, H. & STAINIER, D. Y. 2006. The yolk  
1244 syncytial layer regulates myocardial migration by influencing extracellular matrix  
1245 assembly in zebrafish. *Development*, 133, 4063-72.
- 1246 SCHOCK, F. & PERRIMON, N. 2002. Molecular mechanisms of epithelial morphogenesis. *Annu*  
1247 *Rev Cell Dev Biol*, 18, 463-93.
- 1248 SEDZINSKI, J., HANNEZO, E., TU, F., BIRO, M. & WALLINGFORD, J. B. 2016. Emergence of  
1249 an Apical Epithelial Cell Surface In Vivo. *Dev Cell*, 36, 24-35.
- 1250 SERWANE, F., MONGERA, A., ROWGHANIAN, P., KEALHOFER, D. A., LUCIO, A. A.,  
1251 HOCKENBERY, Z. M. & CAMPAS, O. 2016. In vivo quantification of spatially varying  
1252 mechanical properties in developing tissues. *Nat Methods*.
- 1253 SPRING, K. R. & SIEBENS, A. W. 1988. Solute transport and epithelial cell volume regulation.  
1254 *Comp Biochem Physiol A Comp Physiol*, 90, 557-60.
- 1255 TAY, H. G., SCHULZE, S. K., COMPAGNON, J., FOLEY, F. C., HEISENBERG, C. P., YOST, H.  
1256 J., ABDELILAH-SEYFRIED, S. & AMACK, J. D. 2013. Lethal giant larvae 2 regulates  
1257 development of the ciliated organ Kupffer's vesicle. *Development*, 140, 1550-9.
- 1258 TUNGGAL, J. A., HELFRICH, I., SCHMITZ, A., SCHWARZ, H., GUNZEL, D., FROMM, M.,  
1259 KEMLER, R., KRIEG, T. & NIESSEN, C. M. 2005. E-cadherin is essential for in vivo  
1260 epidermal barrier function by regulating tight junctions. *EMBO J*, 24, 1146-56.
- 1261 VALVERDE, M. A., O'BRIEN, J. A., SEPULVEDA, F. V., RATCLIFF, R. A., EVANS, M. J. &  
1262 COLLEDGE, W. H. 1995. Impaired cell volume regulation in intestinal crypt epithelia of  
1263 cystic fibrosis mice. *Proc Natl Acad Sci U S A*, 92, 9038-41.
- 1264 VAZQUEZ, E., NOBLES, M. & VALVERDE, M. A. 2001. Defective regulatory volume decrease  
1265 in human cystic fibrosis tracheal cells because of altered regulation of intermediate  
1266 conductance Ca<sup>2+</sup>-dependent potassium channels. *Proc Natl Acad Sci U S A*, 98, 5329-  
1267 34.
- 1268 VENNEKENS, R., TROUET, D., VANKEERBERGHEN, A., VOETS, T., CUPPENS, H.,  
1269 EGGERMONT, J., CASSIMAN, J. J., DROOGMANS, G. & NILIUS, B. 1999. Inhibition of

- 1270 volume-regulated anion channels by expression of the cystic fibrosis transmembrane  
1271 conductance regulator. *J Physiol*, 515 ( Pt 1), 75-85.
- 1272 VILLASENOR, A., CHONG, D. C., HENKEMEYER, M. & CLEAVER, O. 2010. Epithelial  
1273 dynamics of pancreatic branching morphogenesis. *Development*, 137, 4295-305.
- 1274 WANG, G., CADWALLADER, A. B., JANG, D. S., TSANG, M., YOST, H. J. & AMACK, J. D.  
1275 2011. The Rho kinase Rock2b establishes anteroposterior asymmetry of the ciliated  
1276 Kupffer's vesicle in zebrafish. *Development*, 138, 45-54.
- 1277 WANG, G., MANNING, M. L. & AMACK, J. D. 2012. Regional cell shape changes control form  
1278 and function of Kupffer's vesicle in the zebrafish embryo. *Dev Biol*, 370, 52-62.
- 1279 WILSON, S. M., OLVER, R. E. & WALTERS, D. V. 2007. Developmental regulation of luminal  
1280 lung fluid and electrolyte transport. *Respir Physiol Neurobiol*, 159, 247-55.
- 1281 WOO, S., HOUSLEY, M. P., WEINER, O. D. & STAINIER, D. Y. 2012. Nodal signaling regulates  
1282 endodermal cell motility and actin dynamics via Rac1 and Prex1. *J Cell Biol*, 198, 941-  
1283 52.
- 1284 YUAN, S., LI, J., DIENER, D. R., CHOMA, M. A., ROSENBAUM, J. L. & SUN, Z. 2012. Target-  
1285 of-rapamycin complex 1 (Torc1) signaling modulates cilia size and function through  
1286 protein synthesis regulation. *Proc Natl Acad Sci U S A*, 109, 2021-6.
- 1287 ZHANG, W. K., WANG, D., DUAN, Y., LOY, M. M., CHAN, H. C. & HUANG, P. 2010.  
1288 Mechanosensitive gating of CFTR. *Nat Cell Biol*, 12, 507-12.

1289

1290

1291

1292

1293

1294

1295

1296

1297

1298

1299

1300

1301

1302

1303

1304

1305

1306

1307

1308

1309 **FIGURES AND FIGURE LEGENDS**

1310

1311

1312

Figure 1

1313

1314

1315

1316

1317

1318

1319

1320

1321

1322

1323

1324

1325

1326

1327

1328

1329

1330

1331

1332

1333

1334

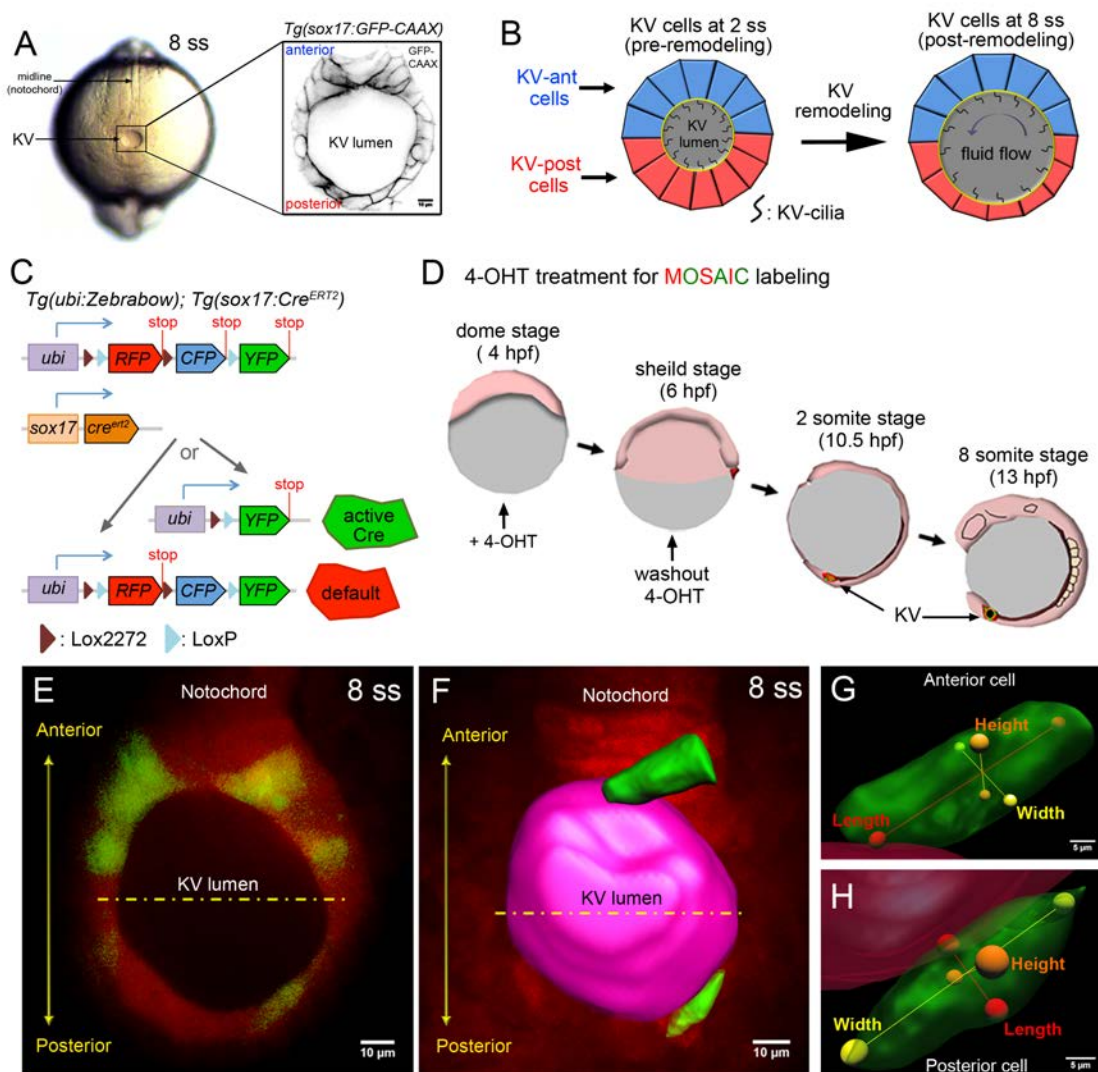

1335 **Figure 1. Mosaic labeling of KV cells.** (A) A dorsal view of the tailbud in a live zebrafish  
 1336 embryo at the 8-somite stage (8 ss) of development. Kupffer's vesicle (KV) is positioned at the  
 1337 end of the notochord. The inset shows GFP-labeled KV cells surrounding the fluid-filled KV  
 1338 lumen in a *Tg(sox17:GFP-CAAX)* transgenic embryo at 8 ss. This is the middle plane of the KV.  
 1339 Scale = 10 $\mu$ m. (B) Schematic of cell shape changes during KV remodeling. KV-ant cells (blue)  
 1340 and KV-post cells (red) have similar shapes at 2 ss, but then undergo regional cell shape  
 1341 changes such that KV-ant cells are elongated and KV-post cells are wide and thin by 8 ss.

1342 These cell shape changes result in asymmetric positioning of motile cilia that generate fluid  
1343 flows for left-right patterning. **(C)** Structure of the *ubi:zebrabow* and *sox17:Cre<sup>ERT2</sup>* transgenes  
1344 and the possible recombination outcomes of the 'zebrabow' transgene by Cre recombinase  
1345 activity in KV cell lineages. **(D)** Time course of mosaic labeling of KV cells. Brief treatment of  
1346 double transgenic *Tg(sox17:Cre<sup>ERT2</sup>); Tg(ubi:Zebrabow)* embryos with 4-OHT from the dome  
1347 stage to the shield stage generates low levels of Cre activity that changes expression of default  
1348 RFP to expression of YFP in a subset of KV cells. **(E)** Mosaic labeled YFP<sup>+</sup> KV cells at the  
1349 middle plane of KV at 8 ss. **(F)** 3D reconstructed KV cells (green) and KV lumen (pink) at 8 ss.  
1350 Scale = 10µm. **(G-H)** Morphometric parameters of 3D rendered KV-ant **(G)** and KV-post **(H)**  
1351 cells: length = axis spanning from apical to basal side of the cell, height = axis spanning from  
1352 dorsal to ventral side of the cell, and width = axis connecting lateral sides of the cell. Scale =  
1353 5µm.

1354

1355

1356

1357

1358

1359

1360

1361

1362

1363

1364

1365

1366

1367

1368

1369

1370

1371

1372

1373

1374



1375

1376

1377

1378

1379

1380

1381

1382

1383

1384

1385

1386

1387

1388

1389

1390

1391

1392

1393

1394

1395

1396

1397

Figure 2

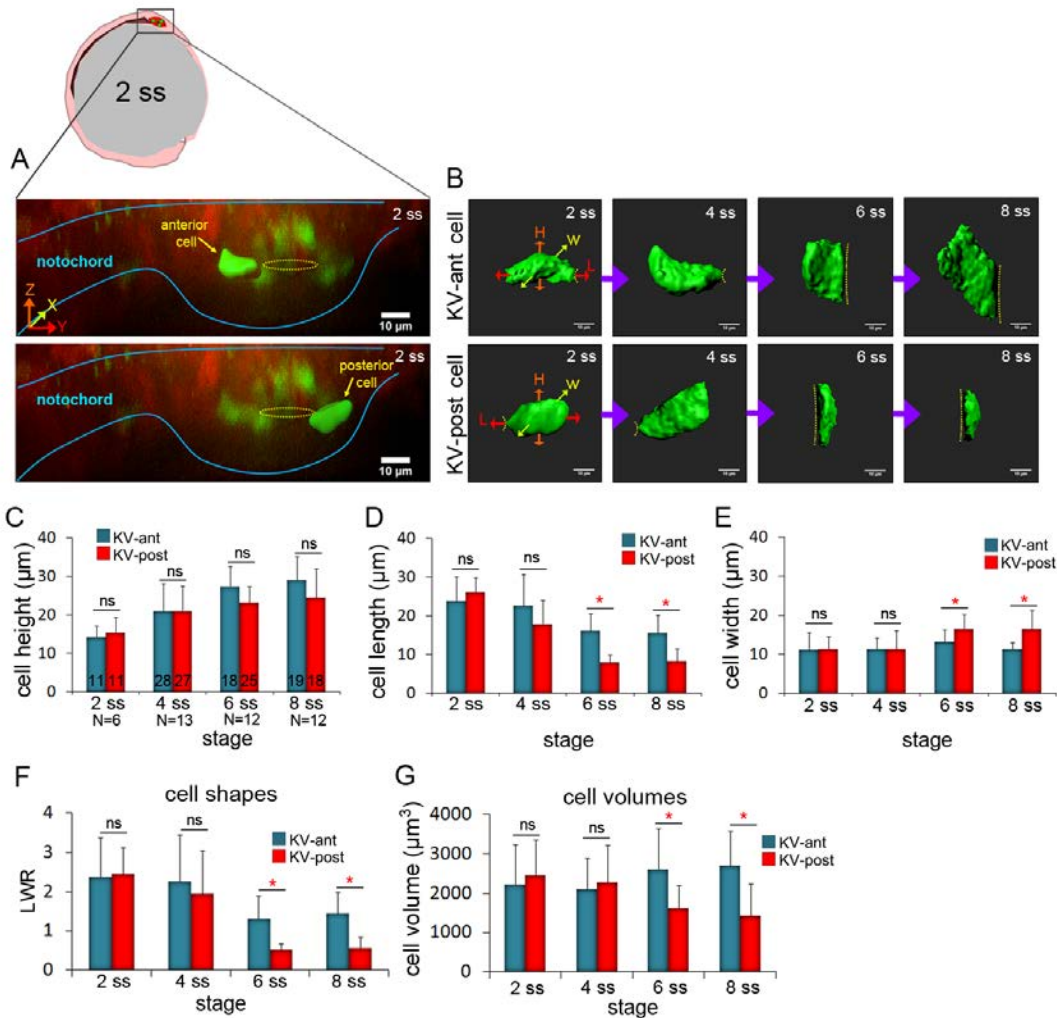

1398 **Figure 2. 3D morphometric analysis of single cells reveals asymmetric cell volume**

1399 **changes during asymmetric KV cell shape changes. (A)** A lateral view of a mosaic labeled

1400 KV in a *Tg(sox17:Cre<sup>ERT2</sup>); Tg(ubi:Zebrawow)* at 2 ss. The embryo diagram represents the

1401 orientation of the image. The notochord and KV are outlined in blue. Yellow lines mark the KV

1402 lumen. Examples of 3D reconstructed KV-ant and KV-post cells along the middle plane of KV

1403 are shown. Scale = 10μm. **(B)** Representative snapshots of 3D rendered KV-ant and KV-post

1404 cells at different stages of KV development between 2 ss and 8 ss. The parameters including

1405 height (H), length (L) and width (W) were used to quantify cell morphology. Yellow lines indicate

1406 the KV luminal surface. Scale = 10μm. **(C-E)** Quantification of height (C), length (D) and width

1407 (E) of individual KV-ant and KV-post cells during development. **(F)** A length-to-width ratio (LWR)

1408 was used to describe KV cell shapes. KV-ant and KV-post cells change shape between 4 ss  
1409 and 6 ss. **(G)** Volume measurements of individual KV cells at different stages of development.  
1410 Similar to cell shapes, KV-ant and KV-post cells change volume between 4 ss and 6 ss. All  
1411 measurements presented in C-G were made on the same group of reconstructed cells. The  
1412 number of KV-ant and KV-post cells analyzed is indicated in the graph in C. N = number of  
1413 embryos analyzed at each stage. Graphs show the mean + SD. Results were pooled from three  
1414 independent experiments. \*p < 0.01 and ns = not significant (Student's T-Test).

1415

1416

1417

1418

1419

1420

1421

1422

1423

1424

1425

1426

1427

1428

1429

1430

1431

1432

1433

1434

1435

1436

1437

1438

1439

1440

1441

1442

1443

Figure 2-figure supplement 1

1444

1445

1446

1447

1448

1449

1450

1451

1452

1453

1454

1455

1456

1457

1458

1459

1460

1461

1462

1463

1464

1465

1466

1467

1468

1469

1470

1471

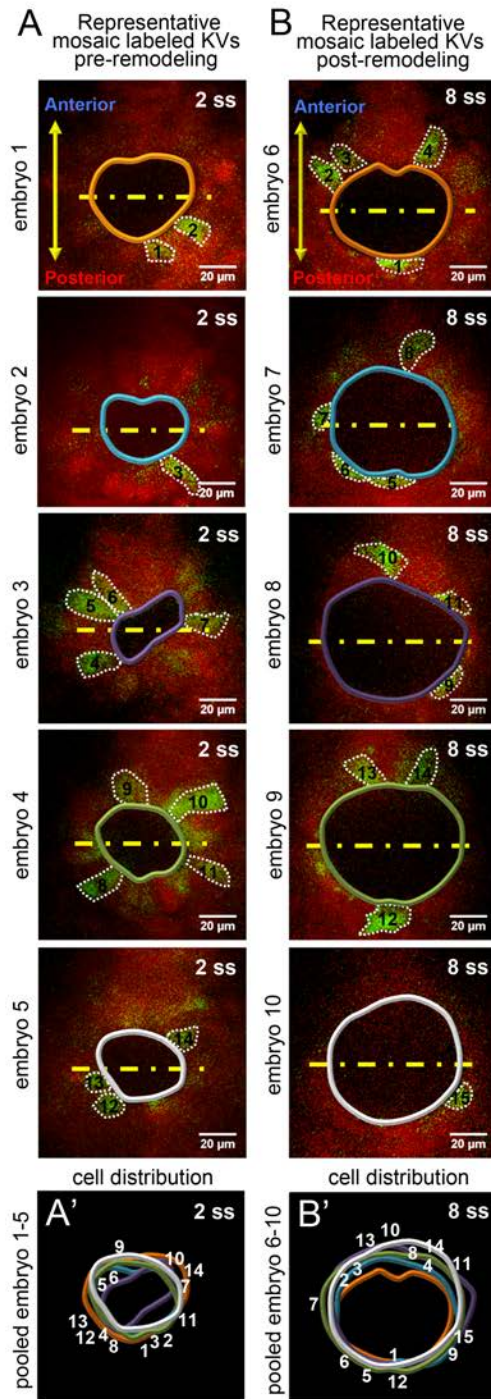

1472 **Figure 2-figure supplement 1. Single KV cells were sampled from all positions along the**  
1473 **middle plane of KV for morphometric analysis. (A,B)** Representative mosaic labeled KVs at  
1474 pre (2 ss) and post-remodeling (8 ss) stages. YFP<sup>+</sup> cells along the middle plane of the organ are  
1475 numbered. KV lumen and cell boundaries are outlined. Yellow lines divide the KV lumen into  
1476 anterior and posterior halves. **(A',B')** Pooled images of KV lumen boundaries and cell numbers  
1477 show no bias in the distribution of mosaic labeled cells. Scale = 20μm.

1478

1479

1480

1481

1482

1483

1484

1485

1486

1487

1488

1489

1490

1491

1492

1493

1494

1495

1496

1497

1498

1499

1500

1501

1502

1503

1504

1505

1506

Figure 2-figure supplement 2

1507

1508

1509

1510

1511

1512

1513

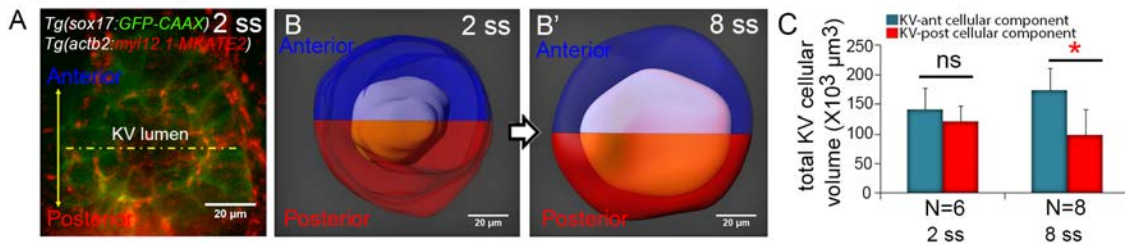

1514 **Figure 2-figure supplement 2. Total changes in KV volume during KV morphogenesis. (A)**

1515 A double transgenic *Tg(sox17:GFP-CAAX); Tg(actb2:myl12.1-MKATE2)* embryo, in which GFP

1516 expression marks KV cells and MKATE2 expression marks the KV lumen. **(B)** 3D reconstruction

1517 of the entire KV organ at 2 ss (B) and 8 ss (B'). The KV lumen was split into two equal halves

1518 (purple and orange) along anteroposterior axis. This line bisecting the KV was then used to

1519 define the anterior (blue) and posterior (red) regions of the cellular component of KV. **(C)** The

1520 graph represents total volumes of anterior and posterior KV cellular components at 2 ss and 8

1521 ss. Shown is the mean + SD. Results are pooled from two independent experiments. N =

1522 number of embryos analyzed at each stage. \*p < 0.01 and ns = not significant (Student's T-

1523 Test).

1524

1525

1526

1527

1528

1529

1530

1531

1532

1533

1534

1535

1536

1537

1538

### Figure 3

1539

1540

1541

1542

1543

1544

1545

1546

1547

1548

1549

1550

1551

1552

1553

1554

1555

1556

1557

1558

1559

1560

1561

1562

1563

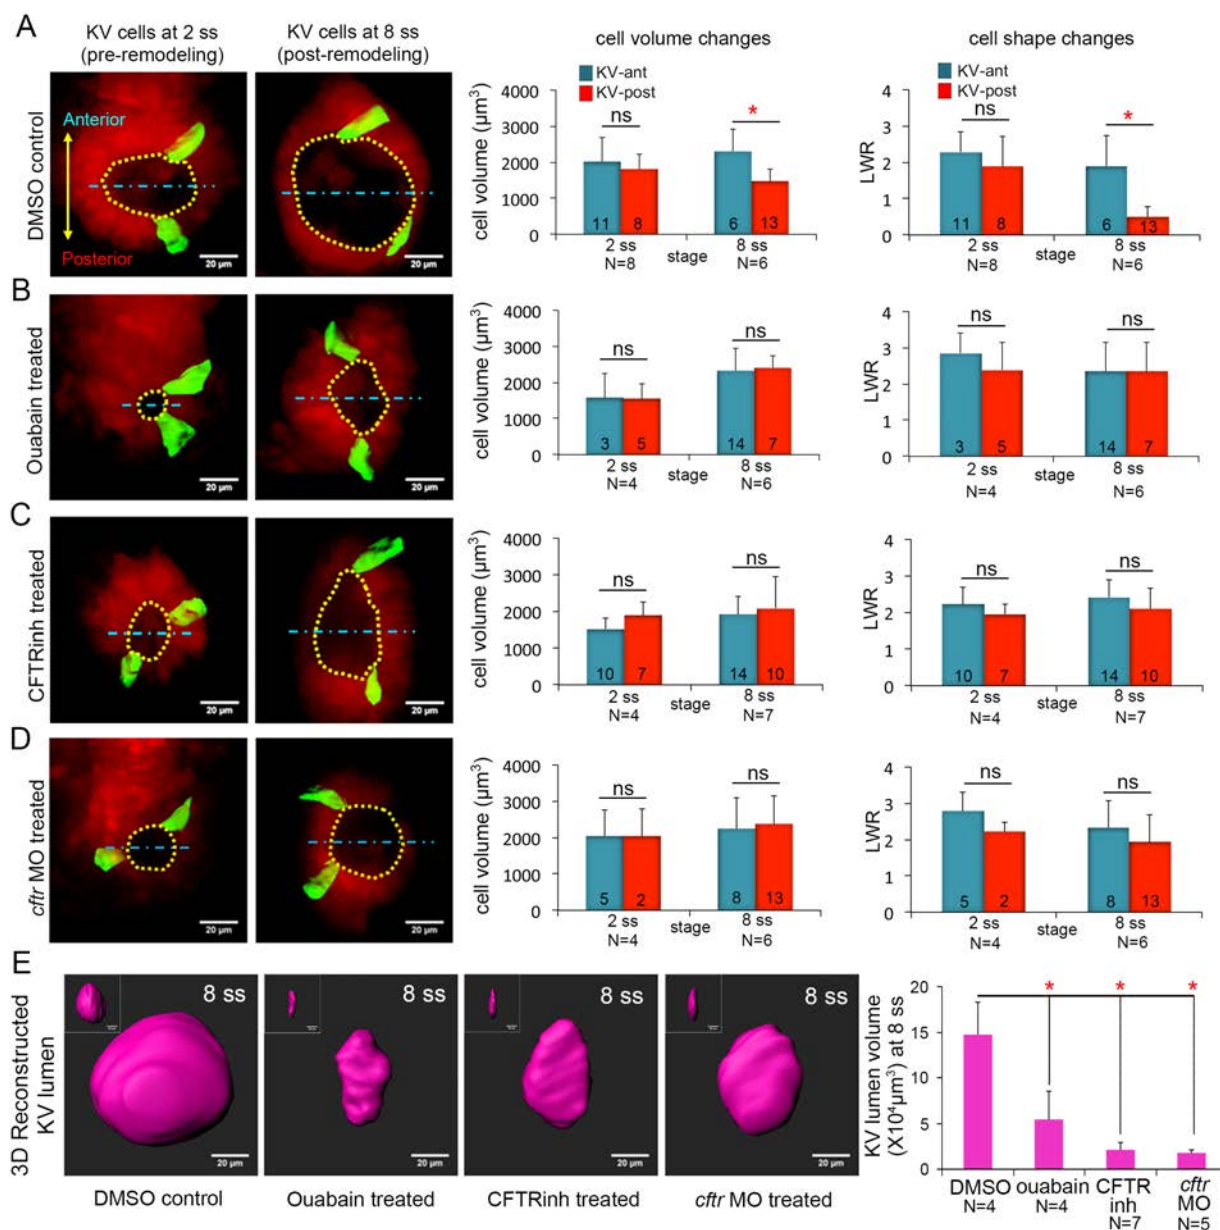

1564 **Figure 3. Ion channel activity mediates asymmetric KV cell volume changes, KV lumen**

1565 **expansion and KV cell shape changes. (A)** 3D reconstructed KV-ant and KV-post cells in

1566 mosaic labeled *Tg(sox17:Cre<sup>ERT2</sup>); Tg(ubi:Zebrawow)* control embryos (treated with vehicle

1567 DMSO) showed asymmetric cell volume changes and asymmetric cell shape changes (length-

1568 to-width ratio) between 2 ss and 8 ss. **(B)** Inhibiting the Na<sup>+</sup>/K<sup>+</sup>-ATPase with ouabain treatments

1569 reduced KV lumen expansion and disrupted asymmetric cell volume changes. KV cells in

1570 ouabain treated embryos did not undergo asymmetric shape changes. **(C-D)** Interfering with Cfr

1571 function using the small molecule inhibitor CFTRinh-172 (C) or *ctfr* MO (D) also blocked KV  
1572 lumenogenesis and disrupted asymmetric cell volume changes and shape changes of KV cells.  
1573 (E) Quantification of 3D reconstructed KV lumen volumes (insets depict lumen in YZ axis) in  
1574 control and treated live embryos at 8 ss. For all quantitative analyses, the mean + SD is shown.  
1575 The number of KV-ant and KV-post cells analyzed is indicated in the graphs in A-D. N = number  
1576 of embryos analyzed. Results were pooled from two independent trials. Scale = 20 $\mu$ m, \*p < 0.01  
1577 and ns = not significant (Student's T-Test).

1578

1579

1580

1581

1582

1583

1584

1585

1586

1587

1588

1589

1590

1591

1592

1593

1594

1595

1596

1597

1598

1599

1600

1601

1602

1603

1604

1605

Figure 3-figure supplement 1

1606

1607

1608

1609

1610

1611

1612

1613

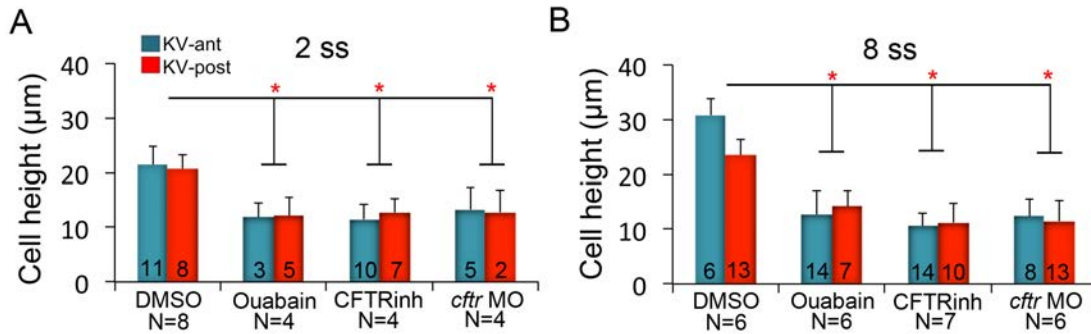

1614 **Figure 3-figure supplement 1. KV cell heights in embryos treated with ion channel**

1615 **inhibitors. (A-B)** Quantification of individual KV-ant and KV-post cell heights from different

1616 treatments at 2 ss (A) and 8 ss (B). Results were pooled from two independent experiments at

1617 each stage. The number of KV-ant and KV-post cells analyzed is indicated within the graph. N =

1618 number of embryos analyzed at each stage. Shown is the mean + SD, \*p < 0.01 and ns = not

1619 significant (Student's T-Test).

1620

1621

1622

1623

1624

1625

1626

1627

1628

1629

1630

1631

1632

1633

1634

1635

1636



1637

Figure 3-figure supplement 2

1638

1639

1640

1641

1642

1643

1644

1645

1646

1647

1648

1649

1650

1651

1652

1653

1654

1655

1656

1657

1658

1659

1660

1661

1662

1663

1664

1665

1666

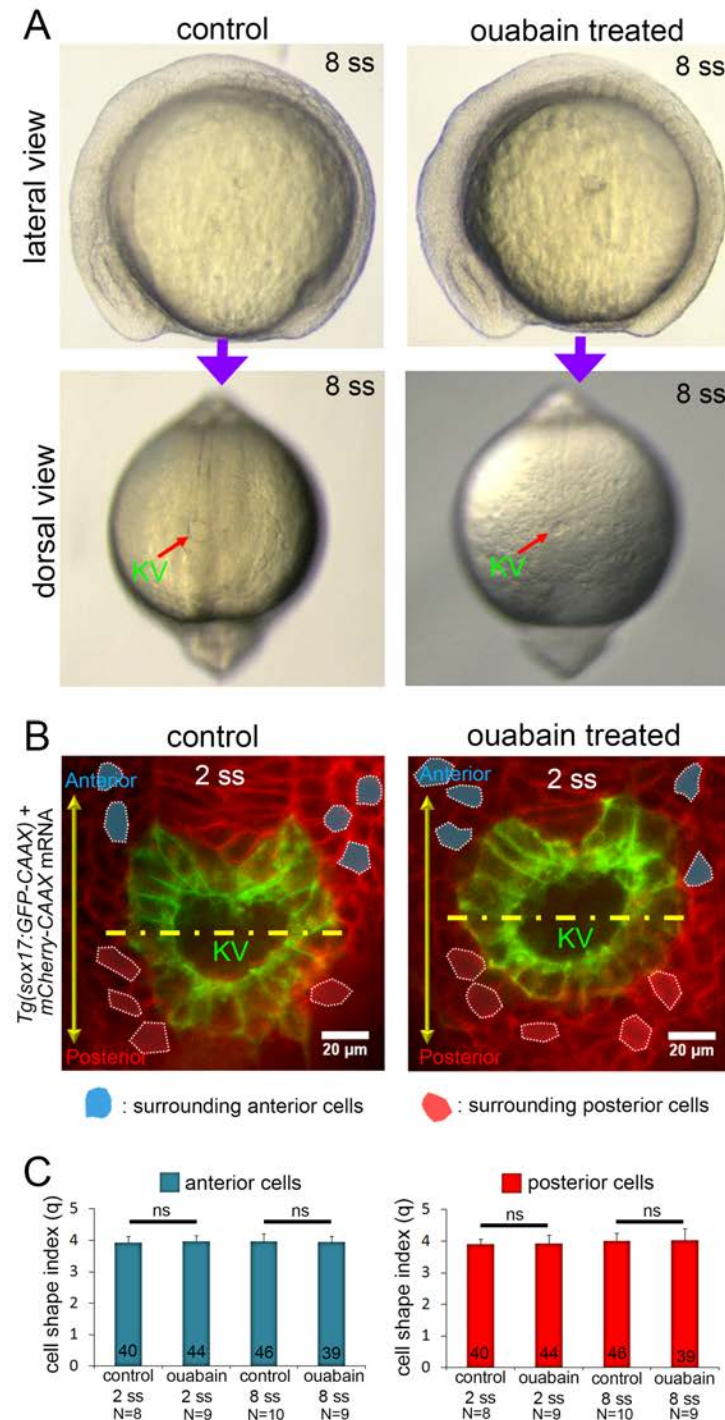

1667 **Figure 3-figure supplement 2. Morphology of external cells surrounding KV in ouabain**

1668 **treated embryos. (A)** Ouabain treatment did not cause gross developmental defects as

1669 compared to control embryos, except the KV lumen (arrow) was smaller at 8 ss. **(B)** Ubiquitous

1670 expression of membrane-targeted mCherry (*mCherry-CAAX*) in *Tg(sox17:GFP-CAAX)* embryo  
1671 allowed visualization both KV cells at the middle plane of KV and the surrounding external cells  
1672 in control and ouabain treated embryos. Surrounding cells with clear boundaries were selected  
1673 for cell shape analysis. Representative surrounding cells at 2 ss in the anterior (blue) or  
1674 posterior (red) region of KV are shown. Yellow line divides KV lumen into anterior and posterior  
1675 halves. Scale = 20 $\mu$ m. (C) Quantitative analysis of cell shape index ( $q$ ) shows no significant  
1676 difference in surrounding cells between control and ouabain treated embryos at 2 ss and 8 ss.  
1677 Results were pooled from two independent experiments at each stage. The number of  
1678 surrounding anterior cells (blue) and surrounding posterior cells (red) analyzed is indicated in  
1679 the graph. N= number of embryos analyzed. Shown is the mean + SD. ns = not significant  
1680 (Student's T-Test).

1681

1682

1683

1684

1685

1686

1687

1688

1689

1690

1691

1692

1693

1694

1695

1696

1697

1698

1699

1700

1701

1702

1703

1704

1705

Figure 4

1706

1707

1708

1709

1710

1711

1712

1713

1714

1715

1716

1717

1718

1719

1720

1721

1722

1723

1724

1725

1726

1727

1728

1729

1730

1731

1732

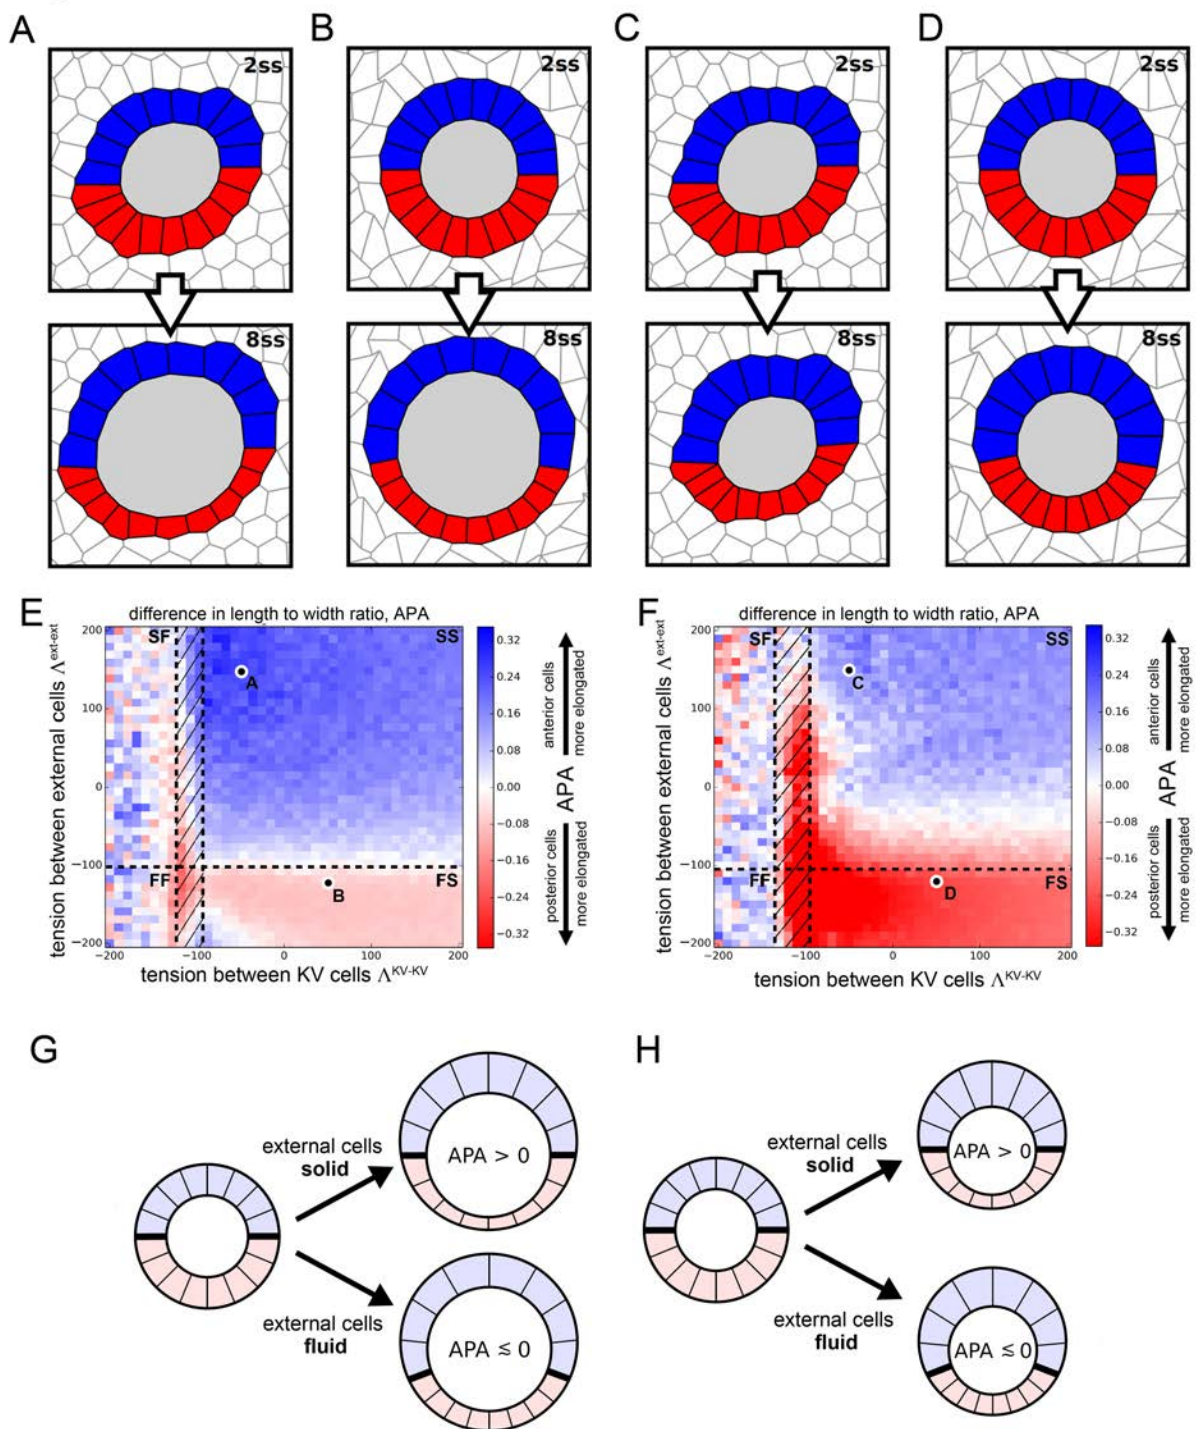

1733 **Figure 4. Vertex model simulations for cell shapes during KV remodeling.**

1734 (A-D) Vertex model simulations with N=10 KV-ant and KV-post cells. Upper and lower panels

1735 respectively show force-balanced states at 2 ss and 8 ss. All shown simulations start from the

1736 same initial cell positions, but the mechanical parameters differ. The full simulation box is  
1737 cropped in order to focus on the KV. For the example of panel A, **Figure 4 – figure supplement**  
1738 **1B** shows the respective full state. **(A)** Both KV and external cells are solid-like (interfacial  
1739 tensions  $\Lambda^{KV-KV} = -50$  and  $\Lambda^{ext-ext} = 150$ ), and the lumen cross-sectional area expands  
1740 according to experimental measurements between 2 and 8 ss. **(B)** KV cells are solid-like  
1741 ( $\Lambda^{KV-KV} = 50$ ), external cells are fluid-like ( $\Lambda^{ext-ext} = -120$ ), and the lumen cross-sectional area  
1742 expands. **(C)** Both KV and external cells are solid-like ( $\Lambda^{KV-KV} = -50$  and  $\Lambda^{ext-ext} = 150$ ) and  
1743 the lumen cross-sectional area stays constant between 2 and 8 ss. **(D)** KV cells are solid-like  
1744 ( $\Lambda^{KV-KV} = 50$ ), external cells are fluid-like ( $\Lambda^{ext-ext} = -120$ ), and the lumen cross-sectional area  
1745 is constant. **(E,F)** Parameter scan for the anterior-posterior asymmetry, APA (LWR-ant – LWR-  
1746 post), depending on the respective interfacial tensions of KV cells and external cells, which  
1747 defines whether these cells are solid-like or fluid-like (FS = external cells fluid-like, KV cells  
1748 solid-like; SS = both external and KV cells are solid-like; FF = both external and KV cells fluid-  
1749 like; SF= external cells solid-like, KV cells fluid-like; hatched region = KV-ant cells solid-like and  
1750 KV-post cells fluid-like). For each pair of interfacial tensions, the APA was computed from the  
1751 average of 100 separate simulation runs. When KV cells are solid-like, the standard error of the  
1752 mean APA is typically on the order of 0.05. However, for fluid-like KV cells standard error of the  
1753 mean APA can become much larger, which is reflected by the large mean APA fluctuations in  
1754 this regime. **(E)** The lumen cross-sectional area changes normally between 2 and 8 ss. **(F)** The  
1755 lumen cross-sectional area is fixed at a constant value between 2 and 8 ss. The parameter  
1756 values corresponding to panels A-D are marked in E,F. For both E and F, a positive APA is  
1757 robustly obtained only when KV and external cells are both solid-like. **(G,H)** Illustrations of how  
1758 mechanical properties of external cells affect APA values in our simulations. For solid external  
1759 cells, the interface between KV-ant and KV-post cells is prevented from moving posteriorly upon  
1760 decreasing KV-post cell cross-sectional areas between 2ss and 8ss. As a consequence, the  
1761 posterior KV cells flatten and obtain a smaller LWR-post value, which results in a positive APA.  
1762 Conversely for fluid external cells, a decrease in KV-post cell cross-sectional area is  
1763 accommodated by a posterior sliding of the interface between KV-ant and KV-post cells.  
1764 Consequently, the APA does not increase and may even decrease. These mechanisms work  
1765 both for increasing lumen cross-sectional area (G) and for constant lumen cross-sectional area  
1766 (H).  
1767

1768

1769

Figure 4-figure supplement 1

1770

1771

1772

1773

1774

1775

1776

1777

1778

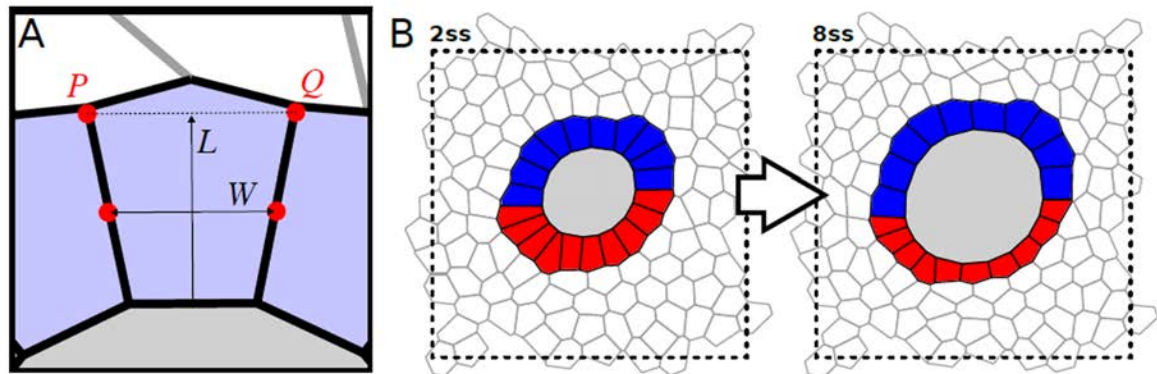

1779 **Figure 4-figure supplement 1. Definition of the length-width ratio (LWR) in the**  
1780 **simulations, and example for full force-balanced state. (A)** The width  $W$  is the distance  
1781 between the midpoints of the respective interfaces with the two adjacent KV cells. The length  $L$   
1782 is the distance from the midpoint of the interface with the lumen to the midpoint between points  
1783  $P$  and  $Q$ . The LWR is defined by the quotient  $L/W$ . **(B)** Non-cropped force-balanced state for the  
1784 example case shown in **Figure 4A**. We use periodic boundary conditions for all our simulations  
1785 (for details see Supplemental Information).

1786

1787

1788

1789

1790

1791

1792

1793

1794

1795

1796

1797

1798

1799

1800

1801

Figure 4-figure supplement 2

1802

1803

1804

1805

1806

1807

1808

1809

1810

1811

1812

1813

1814

1815

1816

1817

1818

1819

1820

1821

1822

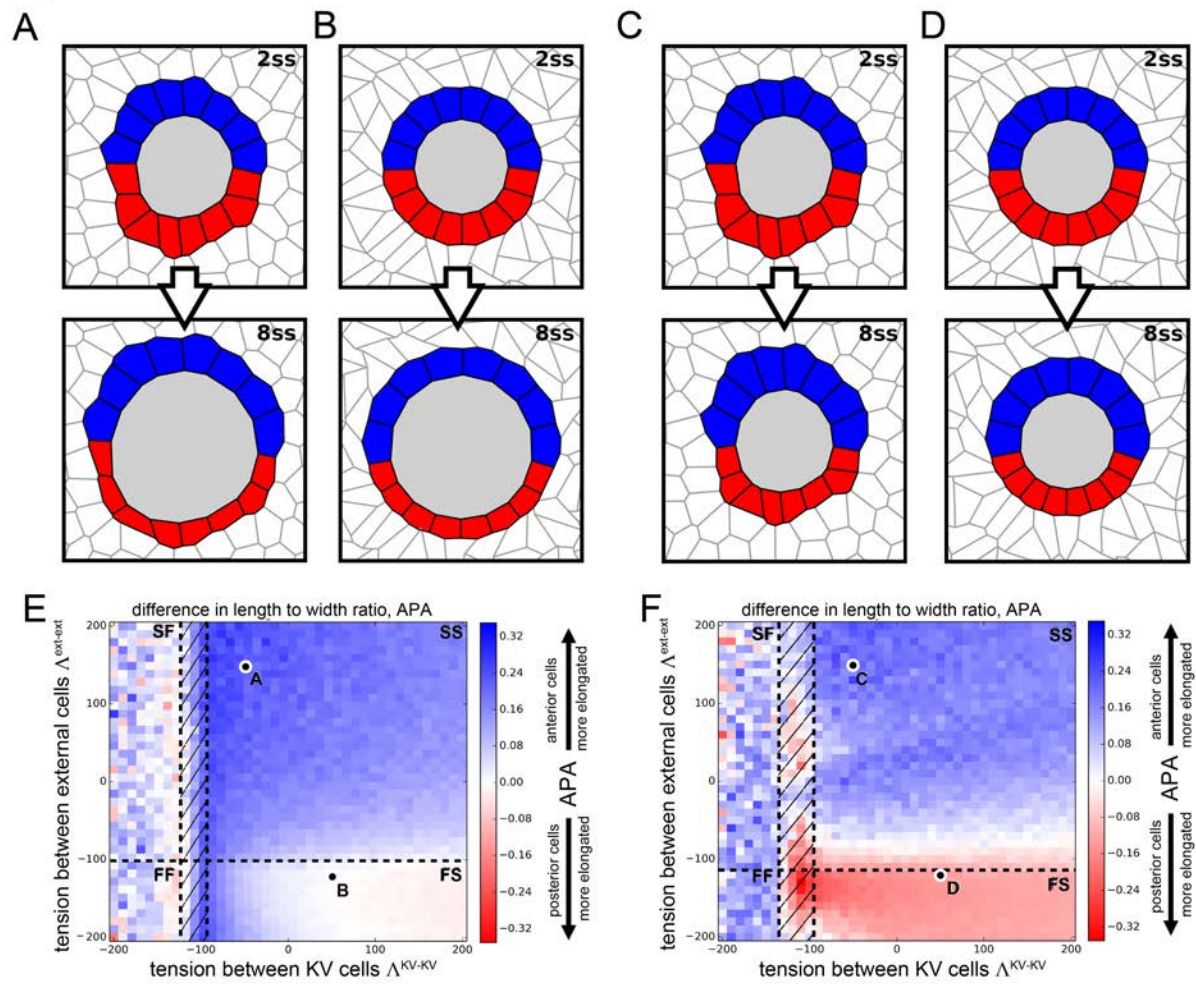

1823 **Figure 4-figure supplement 2. Vertex model simulations for cell shapes during KV**

1824 **remodeling (N=8). Results as in Figure 4 for N=8 KV-ant and KV-post cells.**

1825

1826

1827

1828

1829

1830

1831

1832

1833

1834

### Figure 4-figure supplement 3

1835

1836

1837

1838

1839

1840

1841

1842

1843

1844

1845

1846

1847

1848

1849

1850

1851

1852

1853

1854

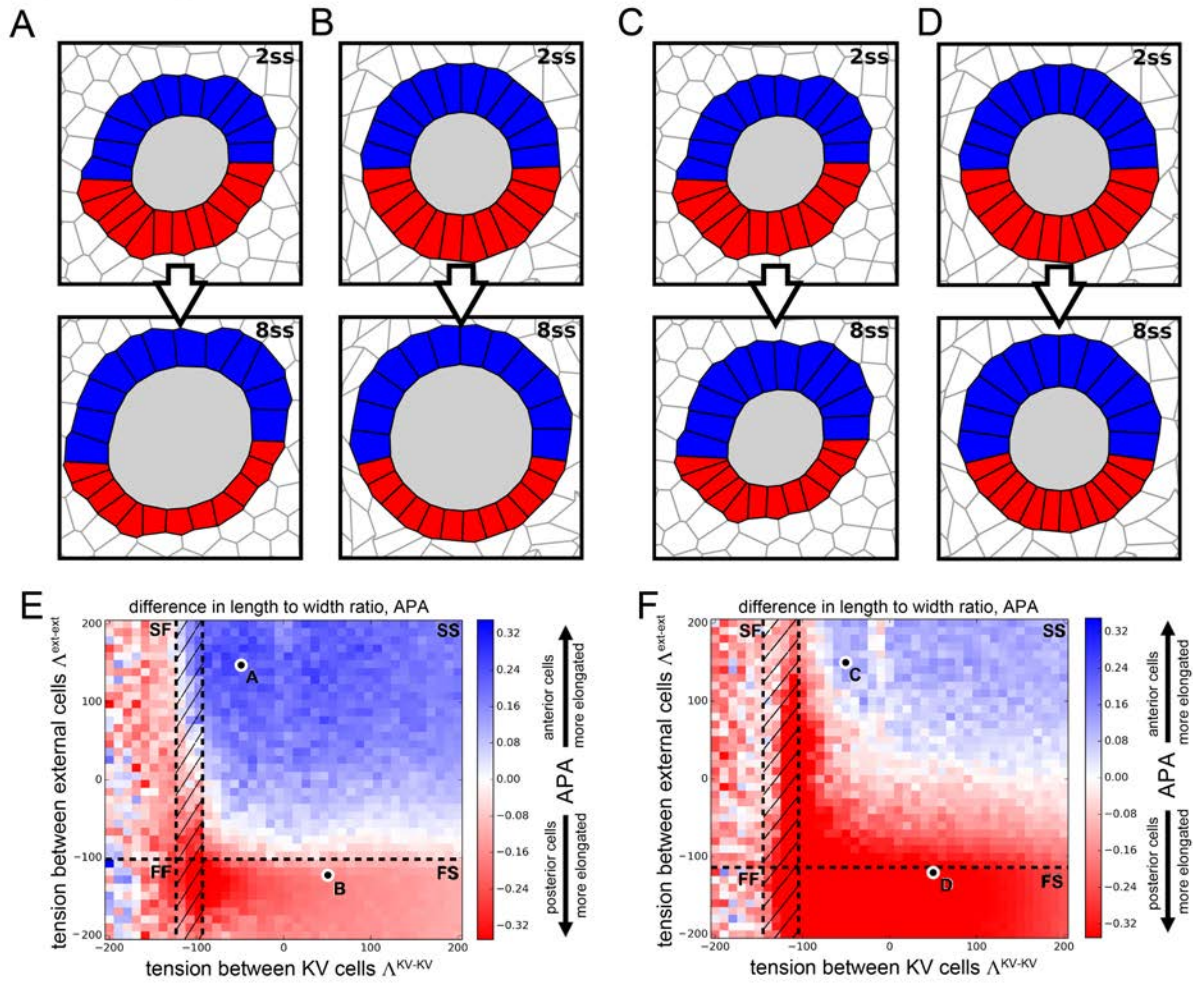

1855 **Figure 4-figure supplement 3. Vertex model simulations for cell shapes during KV**

1856 **remodeling (N=12).** Results as in Figure 3 for 12 KV-ant and KV-post cells.

1857

1858

1859

1860

1861

1862

1863

1864

1865

1866

1867

1868

#### Figure 4-figure supplement 4

1869

1870

1871

1872

1873

1874

1875

1876

1877

1878

1879

1880

1881

1882

1883

1884

1885

1886

1887

1888

1889

1890

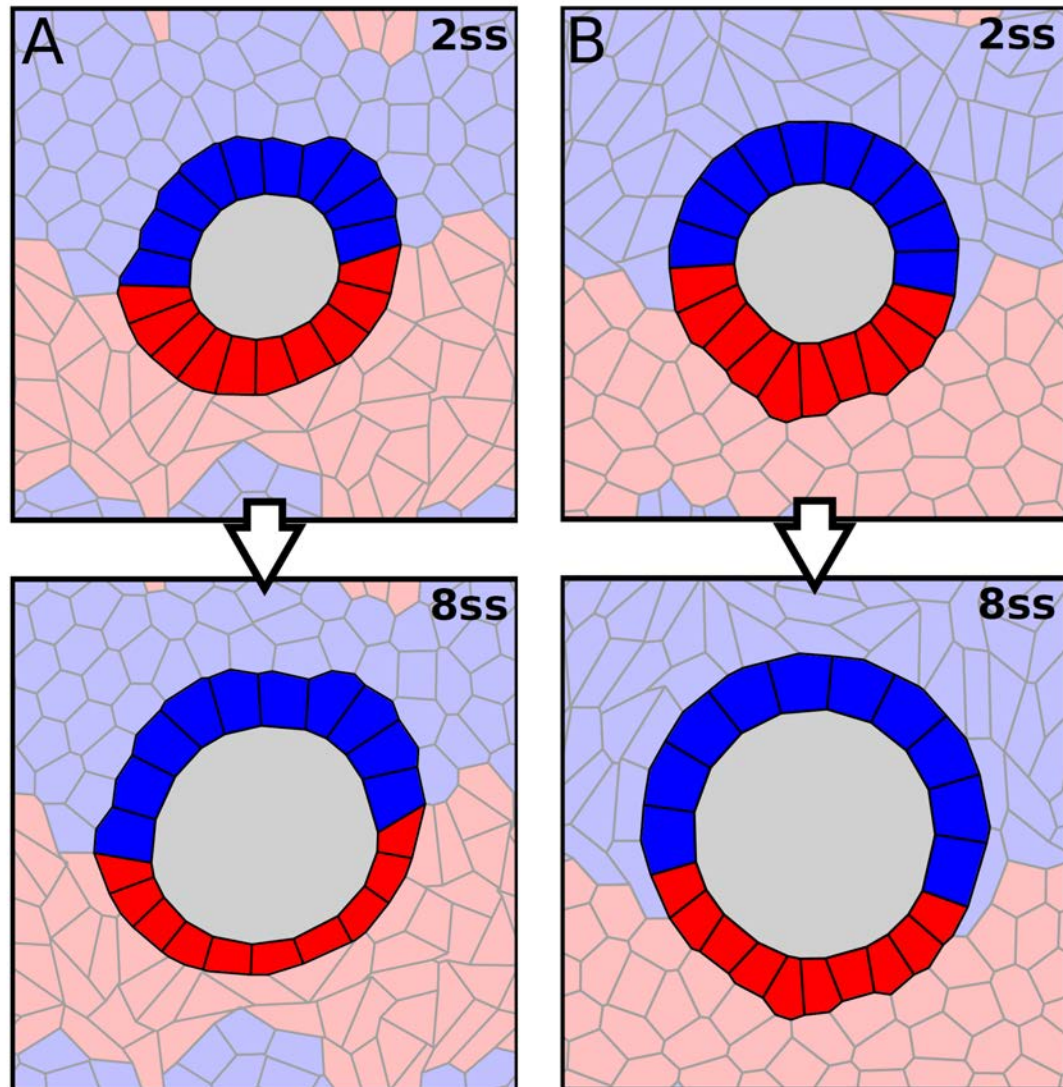

1891 **Figure 4-figure supplement 4. Vertex model simulations with asymmetric properties of**

1892 **the external cells. (A-B)** Vertex model simulations with two populations of external cells.

1893 Anterior external cells are shown in light blue and posterior external cells are shown in light red.

1894 Anterior cells also show up on the bottom and posterior cells show up on the top because of

1895 periodic boundary conditions (see Supplemental material). Similar to **Figure 4A-D**, upper and

1896 lower panels respectively show force-balanced states at 2 ss and 8 ss. The KV cells are solid-

1897 like with  $\Lambda^{KV-KV} = -50$  as in **Figure 4A**. (A) Anterior external cells are solid-like with  $\Lambda^{\text{ext-ext}} =$

1898 150, and posterior external cells are fluid-like with  $\Lambda^{\text{ext-ext}} = -120$ . (B) Anterior external cells

1899 are fluid-like with  $\Lambda^{\text{ext-ext}} = -120$ , and posterior external cells are solid-like with  $\Lambda^{\text{ext-ext}} = 150$ .



1900

1901

Figure 4-supplement table 1

1902

| Relative anteroposterior (AP) differences of: | at 2 ss         | at 8 ss         |
|-----------------------------------------------|-----------------|-----------------|
| Cell volume                                   | $(-7 \pm 22)\%$ | $(90 \pm 40)\%$ |
| Cell cross-sectional area                     | $(11 \pm 17)\%$ | $(80 \pm 30)\%$ |
| Cell height                                   | $(-1 \pm 20)\%$ | $(18 \pm 14)\%$ |

1903

1904

1905

1906

1907 **Figure 4-supplement table 1.** Percentage differences of cell volume, cell cross sectional area,  
1908 and cell height between anterior and posterior cells [(Post – Ant)/Post] at 2 ss and 8 ss for  
1909 DMSO control embryos. The cell volume is proportional to the product of cross-sectional area  
1910 and height. As a consequence, if the AP difference in cell volume was fully due to the difference  
1911 in the cross-sectional areas, then the percentage differences of both volumes and cross-  
1912 sectional areas should be the same. Similarly, if the cell volume difference was fully due to the  
1913 height difference, then the percentage differences of volumes and height should be the same.  
1914 We find that at 2ss, the AP differences are not high in all three quantities. However, at 8ss the  
1915 AP volume difference is very large and is mostly accounted for by the AP difference in cross-  
1916 sectional areas, while the height difference stays comparably small.

1917

1918

1919

1920

1921

1922

1923

1924

1925

1926

1927

Figure 4-supplemental table 2

1928

| Cell type/lumen | Preferred area $A_0$ at 2 ss ( $\mu\text{m}^2$ ) | Preferred area $A_0$ at 8 ss ( $\mu\text{m}^2$ )         |
|-----------------|--------------------------------------------------|----------------------------------------------------------|
| KV-ant cells    | 199                                              | 238                                                      |
| KV-post cells   | 179                                              | 134                                                      |
| External cells  | 189                                              | 170 (lumen area changes)<br>190 (no lumen area change)   |
| Lumen           | 1657                                             | 3602 (lumen area changes)<br>1657 (no lumen area change) |

1929

1930

1931

1932

1933

1934

1935 **Figure 4-supplement table 2.** Preferred areas  $A_0$  prescribed in our vertex model simulations  
1936 for the different cell types at 2 ss and 8 ss. The listed values for lumen and KV cells are  
1937 experimentally measured average cross-sectional areas from DMSO-treated control embryos.  
1938 The 2 ss values for the external cells were set to the average of KV-ant and KV-post cells. The  
1939 preferred area of the external cells at 8 ss is chosen such that the total preferred area stays  
1940 constant between 2 ss and 8 ss. Note that in **Figure 4A,B,E**, the lumen area changes between  
1941 2 ss and 8 ss (same in **Figure 4 – figure supplements 2,3A,B,E**), while in **Figure 4C,D,F**, the  
1942 lumen area at 8ss is set to the value measured at 2 ss (same in **Figure 4 – figure**  
1943 **supplements 2,3C,D,F**). In order to facilitate comparison with experimental data, we choose  
1944 micro-meters ( $\mu\text{m}$ ) as length units for our vertex model simulations.

1945

1946

1947

1948

1949

1950

1951

1952

1953

1954

1955

1956

1957

1958  
1959  
1960  
1961  
1962  
1963  
1964  
1965  
1966  
1967  
1968  
1969  
1970  
1971  
1972  
1973  
1974  
1975  
1976  
1977  
1978  
1979  
1980  
1981  
1982  
1983  
1984  
1985  
1986  
1987

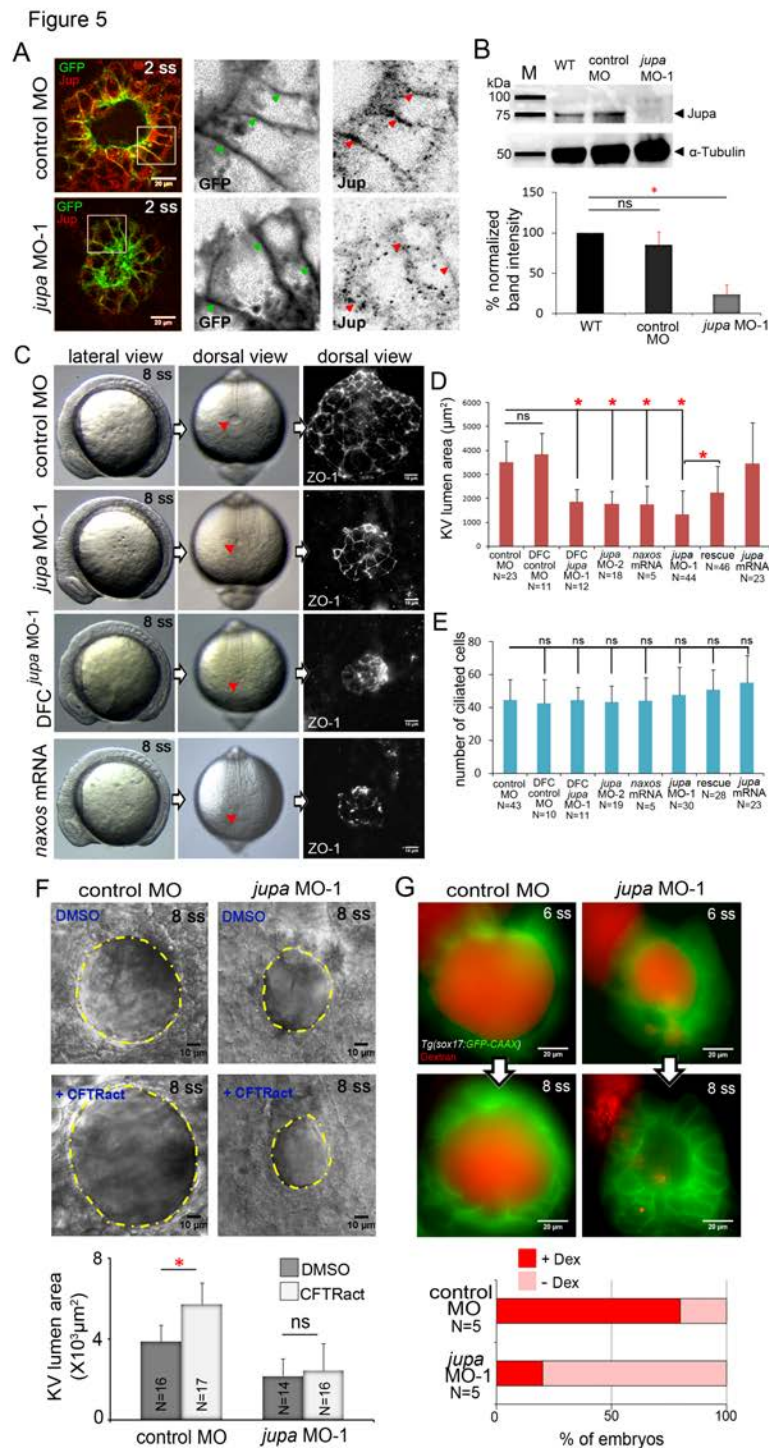

1988 **Figure 5. Interfering with Junction plakoglobin inhibits KV lumen expansion.** (A)  
1989 Immunostaining with Jup antibodies shows Jup enrichment at lateral membranes of KV cells  
1990 marked by membrane-targeted GFP expression in *Tg(sox17:GFP-CAAX)* embryos. Embryos

1991 injected with *jupa* MO-1 showed reduced Jup protein levels. Boxes indicate enlarged regions  
1992 shown as individual channels. Arrows point out representative lateral membranes. Scale =  
1993 20 $\mu$ m. **(B)** Immunoblotting confirmed reduction in Jup protein level (arrowhead) in *jupa* MO-1  
1994 injected embryos relative to wild-type (WT) and control MO injected embryos. The graph shows  
1995 normalized *Jupa* band intensities. Shown is the mean + SD for three independent experiments.  
1996 **(C)** At 8 ss, control embryos showed an inflated KV lumen (red arrow) that was labeled using  
1997 ZO-1 antibody staining. Embryos injected with *jupa* MO-1 to knockdown Jup expression in all  
1998 cells (global knockdown) or specifically in DFC/KV cells (DFC<sup>*jupa* MO-1</sup>) appeared normal at 8 ss  
1999 except that the KV lumen failed to expand. Interfering with Jup by injecting *JUP-naxos* mRNA  
2000 also inhibited KV lumen expansion. Scale = 10 $\mu$ m. **(D)** Quantification of KV lumen area in  
2001 control and treated embryos at 8 ss. Co-injecting *jupa* MO-1 with *jupa* mRNA significantly  
2002 rescued lumenogenesis defects. Shown are mean + SD for three independent experiments. **(E)**  
2003 The number of ciliated KV cells was not different among the treatment groups. Shown is the  
2004 mean + SD for results pooled from three independent experiments. **(F)** Representative images  
2005 of at 8 ss in control and *jupa* MO injected embryos treated with vehicle (DMSO) or CFTRact-09.  
2006 The graph shows KV lumen area (outlined by yellow line) in control and treated embryos. Scale  
2007 = 10 $\mu$ m. Shown is the mean + SD for two independent experiments. **(G)** Representative images  
2008 of KV lumens of contro MO and *jupa* MO embryos injected with rhodamine-dextran. Scale =  
2009 20 $\mu$ m. The graph shows percentage of embryos retaining and losing the fluorescent dye  
2010 between 6 ss and 8 ss from two independent trials. N = number of embryos analyzed. \*p < 0.01  
2011 and ns = not significant (Student's T-Test).

2012

2013

2014

2015

2016

2017

2018

2019

2020

2021

2022

2023

2024

2025

2026

Figure 5-figure supplement 1

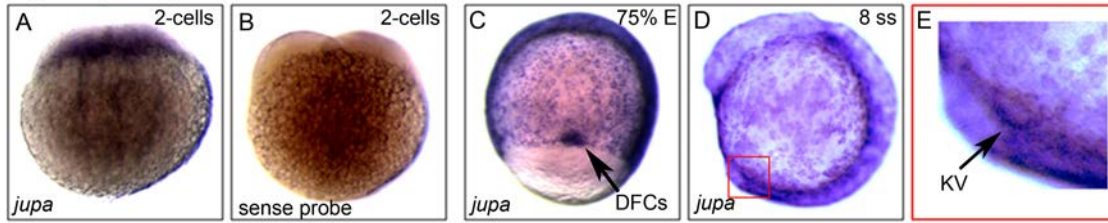

2031

2032 **Figure 5-figure supplement 1. *jupa* is maternally supplied and enriched in precursor**  
2033 **dorsal forerunner cells (DFCs) and KV. (A-E)** RNA *in situ* hybridizations of *jupa* during early  
2034 zebrafish development. (A) Antisense *jupa* probe revealed maternal *jupa* mRNA in 2-cell stage  
2035 embryo. (B) A control *jupa* sense probe showed no staining. (C-D) *jupa* mRNA was detected in  
2036 DFCs (black arrow) and KV cells (red square) during epiboly and early somite stages. (E)  
2037 Enlarged region depicting *jupa* staining in KV (black arrow).

2038

2039

2040

2041

2042

2043

2044

2045

2046

2047

2048

2049

2050

2051

2052

2053

2054

2055

2056

2057

## Figure 5-figure supplement 2

2058

2059

2060

2061

2062

2063

2064

2065

2066

2067

2068

2069

2070

2071

2072

2073

2074

2075

2076

2077

2078

2079

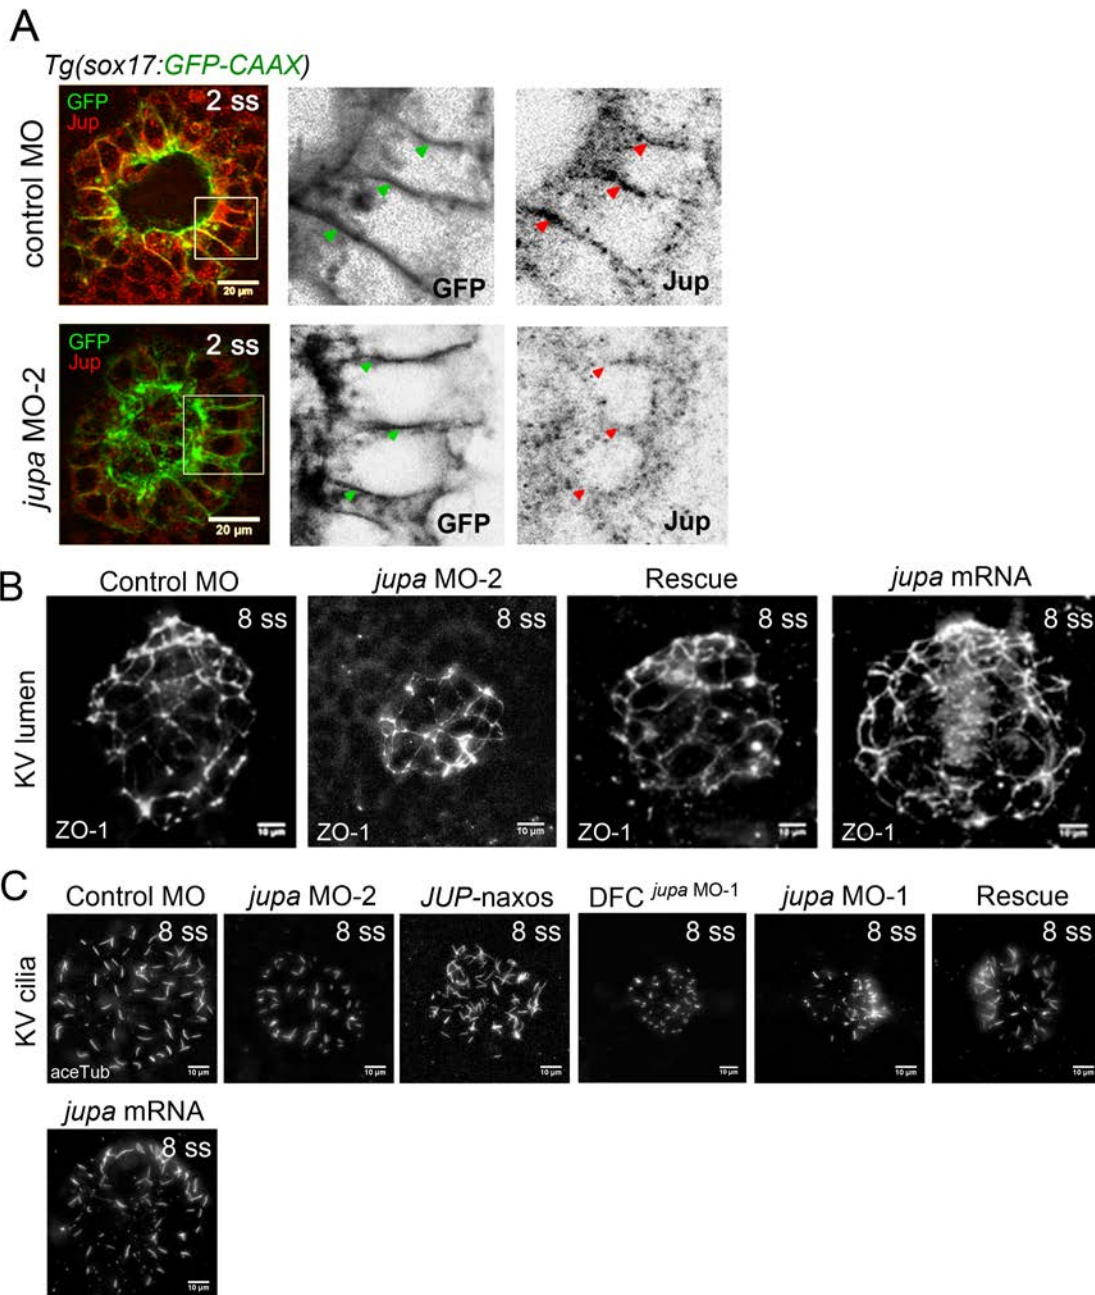

2080 **Figure 5-figure supplement 2. Interfering with Junction plakoglobin inhibits KV**

2081 **lumenogenesis but not ciliated cell number. (A)** Immunostaining with Jup antibodies showed

2082 that embryos injected with *jupa* MO-2 had reduced Jup protein levels in KV relative to control

2083 embryos (image of control MO embryo reproduced from **Figure 5A** for comparison). Boxes

2084 indicate enlarged regions shown as individual channels. Lateral membranes of KV cells are

2085 marked by membrane-targeted GFP expression in *Tg(sox17:GFP-CAAX)* embryos. Arrows

2086 point out representative lateral membranes. Scale = 20 $\mu$ m. **(B)** Representative KV lumens  
2087 labeled using ZO-1 antibody staining at 8 ss from different treatments. Scale = 10 $\mu$ m. **(C)** KV  
2088 cilia labeled using acetylated-tubulin antibody staining at 8 ss from different treatments. Scale =  
2089 10 $\mu$ m.

2090

2091

2092

2093

2094

2095

2096

2097

2098

2099

2100

2101

2102

2103

2104

2105

2106

2107

2108

2109

2110

2111

2112

2113

2114

2115

2116

2117

2118

2119

2120

### Figure 5-figure supplement 3

2121

2122

2123

2124

2125

2126

2127

2128

2129

2130

2131

2132

2133

2134

2135

2136

2137

2138

2139

2140

2141

2142

2143

2144

2145

2146

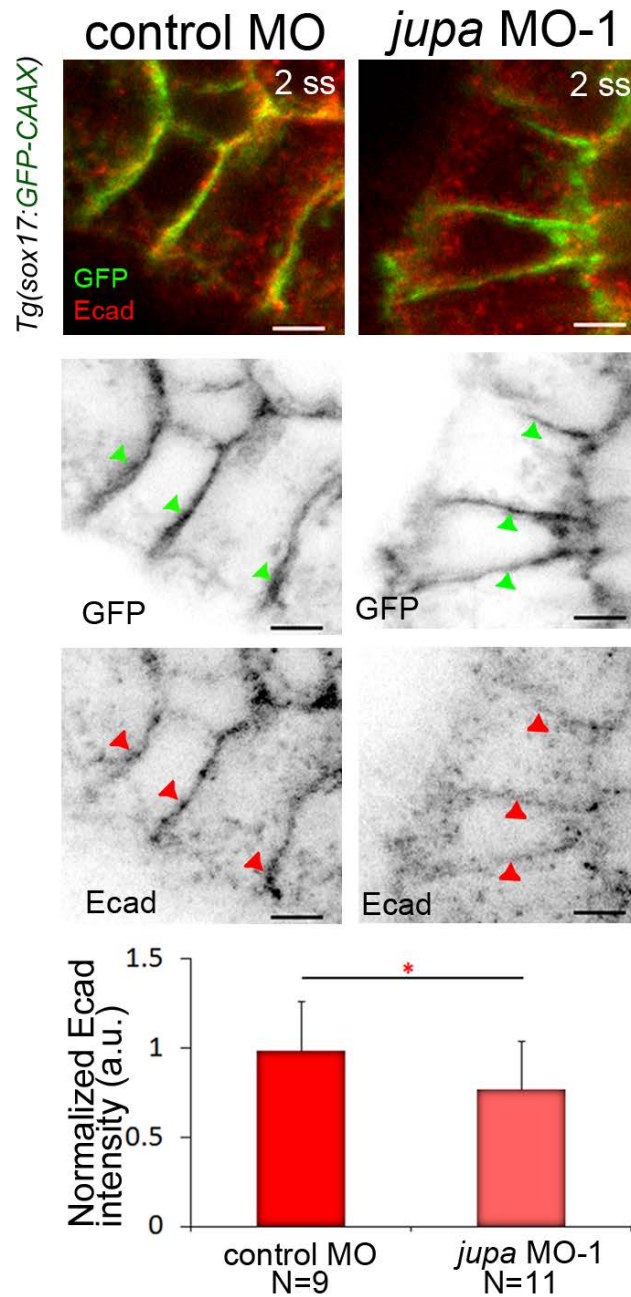

2147 **Figure 5-figure supplement 3. Jupa knockdown results in reduced E-cadherin levels at**

2148 **lateral membranes of KV cells.** Immunostaining with E-cadherin (E-cad) antibodies showed E-

2149 cad enrichment at lateral membranes of KV cells marked by membrane-targeted GFP

2150 expression in *Tg(sox17:GFP-CAAX)* embryos. Embryos injected with *jupa* MO-1 showed a

2151 moderate reduction of E-cad protein enrichment at KV membranes. Arrows point to



2152 representative lateral membranes in individual channels. The graph represents normalized E-  
2153 cad intensities from two experiments. N= number of embryos analyzed. Scale = 5  $\mu$ m. \*p < 0.05  
2154 (Student's T-Test).

2155

2156

2157

2158

2159

2160

2161

2162

2163

2164

2165

2166

2167

2168

2169

2170

2171

2172

2173

2174

2175

2176

2177

2178

2179

2180

2181

2182

2183

2184

2185

2186

2187

2188

2189

2190

2191

2192

2193

2194

2195

2196

2197

2198

2199

2200

2201

2202

2203

2204

Figure 6

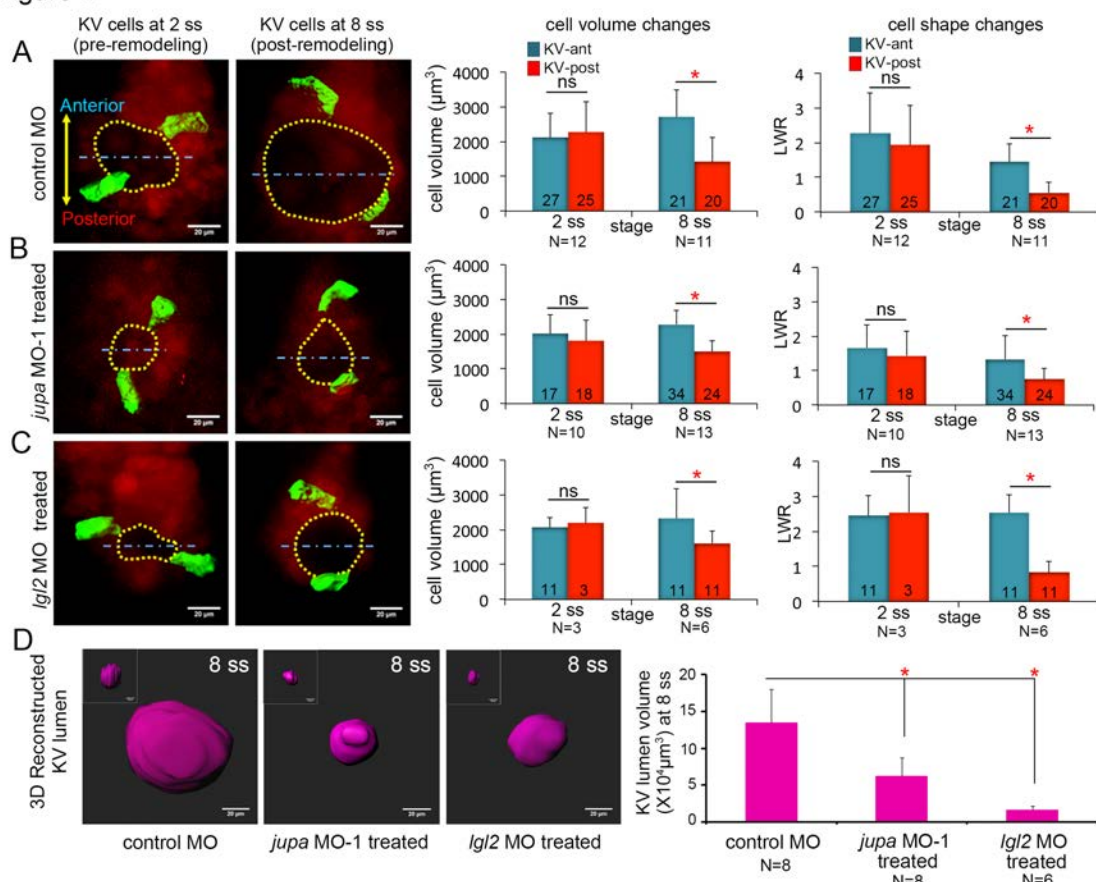

2205 **Figure 6. Asymmetric cell shape changes in KV are separable from lumen expansion. (A)**

2206 Mosaic labeled KV cells in control MO injected embryos showed asymmetric changes in cell

2207 volumes and cell shapes between at 2 ss and 8 ss. **(B-C)** Perturbing cell-cell junction integrity in

2208 KV by interfering with *jupa* (B) or *Igl2* (C) expression inhibited KV lumen expansion, but

2209 asymmetric cell volume changes occurred that were similar to controls. In addition, asymmetric

2210 KV cell shape changes occurred normally in *jupa* and *Igl2* MO embryos. **(D)** Quantification of 3D

2211 reconstructed KV lumen volumes (insets depict KV lumen in YZ axis) in control and treated live

2212 embryos at 8 ss. For quantitative analyses, the mean + SD is shown. The number of KV-ant and

2213 KV-post cells analyzed is indicated in the graphs in A-C. N = number of embryos analyzed. Data

2214 for control MO and *jupa* MO experiments are pooled from three independent experiments and

2215 *Igl2* MO data are pooled from two experiments. Scale = 20 $\mu\text{m}$ . \*p < 0.01 and ns = not

2216 significant (Student's T-Test).

2217

2218

2219

2220

Figure 6-figure supplement 1

2221

2222

2223

2224

2225

2226

2227

2228

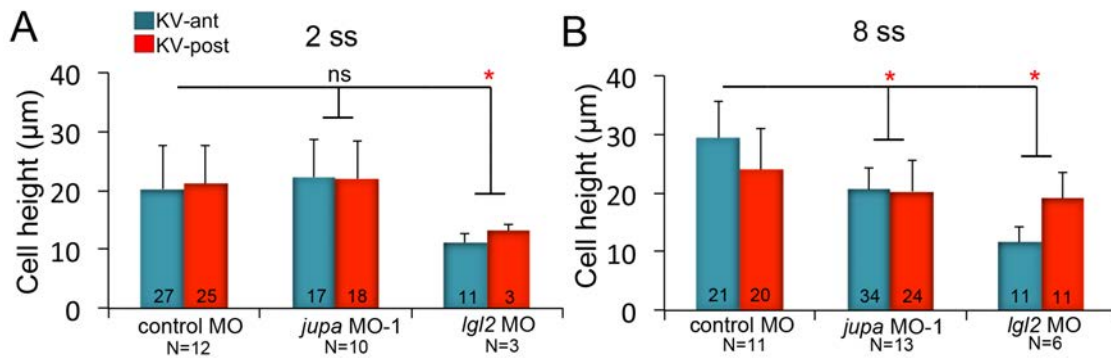

2229 **Figure 6-figure supplement 1. KV cell heights in embryos with KV cell-cell adhesion**

2230 **perturbations. (A-B)** Quantification of individual KV-ant and KV-post cell heights from different

2231 treatments at 2 ss (A) and 8 ss (B). Data for control MO and *jupa* MO experiments are pooled

2232 from three independent experiments and *lgl2* MO data are pooled from two experiments. The

2233 number of KV-ant and KV-post cells analyzed is indicated within the graph. N = number of

2234 embryos analyzed at each stage. Shown is the mean + SD, \*p < 0.01 and ns = not significant

2235 (Student's T-Test).

2236

2237

2238

2239

2240

2241

2242

2243

2244

2245

2246

2247

2248

2249

2250

2251

2252 Figure 7

2253

2254

2255

2256

2257

2258

2259

2260

2261

2262

2263

2264

2265

2266

2267

2268

2269

2270

2271

2272

2273

2274

2275

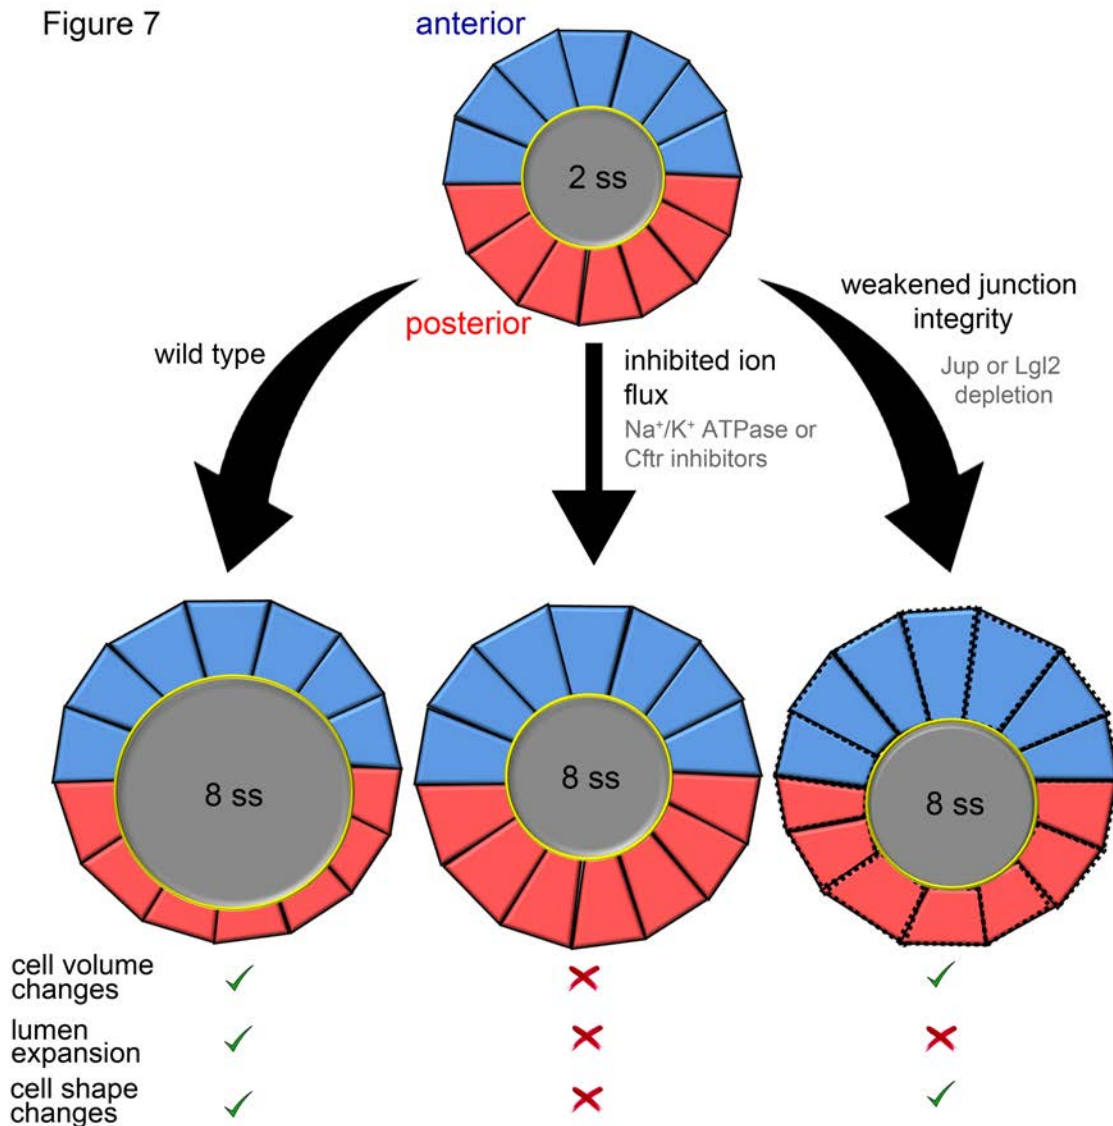

2276 **Figure 7. Summary and working model for epithelial cell shape changes during KV**  
 2277 **morphogenesis.**

2278 Results from experiments and modeling suggest AP asymmetric cell volume changes contribute  
 2279 to asymmetric cell shape changes in the KV epithelium. Inhibiting ion flux blocks asymmetric cell  
 2280 volume changes, lumen expansion and shape changes in KV-ant (blue) and KV-post (red) cells.  
 2281 Vertex simulations predict that asymmetric volume (cross-sectional area) changes in KV cells  
 2282 can introduce AP asymmetry in KV cell shapes without lumen expansion. Consistent with this

2283 prediction, asymmetric changes in KV volume and shape occurred in the absence of lumen  
2284 expansion in embryos with weakened KV cell junction integrity. These results suggest a model  
2285 in which asymmetric cell volume changes contribute to cell shape changes in KV and that this  
2286 process is separable from lumen growth.

2287

2288

2289

2290

2291

2292

2293

2294

2295

2296

2297

2298

2299

2300

2301

2302

2303

2304

2305

2306

2307

2308

2309

2310

2311

2312

2313

2314

2315

2316 **Movie 1.** KV organ architecture in 3D in a live *Tg(sox17:GFP-CAAX)* embryo at 8 ss. The  
2317 membrane-localized GFP marks all cells in KV. KV is rotating along its anteroposterior (AP)  
2318 axis. Scale = 20 $\mu$ m.

2319

2320 **Movie 2.** 3D projection of KV in a live mosaic labeled *Tg(sox17:Cre<sup>ERT2</sup>);*  
2321 *Tg(ubi:ZebraBow)* embryo at 8 ss. Stochastic Cre-mediated recombination labels only few cells  
2322 with YFP expression with clear boundaries that are easily distinguishable from non-recombined  
2323 RFP<sup>+</sup> cells. The KV organ is rotating along its anteroposterior (AP) axis. Scale = 20 $\mu$ m.

2324

2325 **Movie 3.** Time-lapse imaging of KV cells in a live mosaic labeled *Tg(sox17:Cre<sup>ERT2</sup>);*  
2326 *Tg(ubi:ZebraBow)* embryo treated with 4-OHT from dome stage to shield stage. Images were  
2327 collected every 5 min from 2 ss to 8 ss. The movie spans 105 min of development. Single 3D  
2328 rendered KV-ant (blue) and KV-post (red) cells are followed during KV morphogenesis. Scale =  
2329 20 $\mu$ m.

2330
